# Supplementary material for: Genetic targeting of sprouting angiogenesis using Apln-CreER
Source: PubMed Central journal article supplement (PMC4309445; doi:10.1038/ncomms7020), 2015-01-19
Supplement: ncomms7020-s1.pdf [file ncomms7020-s1.pdf]

**Genetic Targeting of Sprouting Angiogenesis Using Apln-CreER**

(NCOMMS-14-10623B)

**Supplementary Information**

**Supplementary Figure 1 – 21**

**Supplementary Table 1**

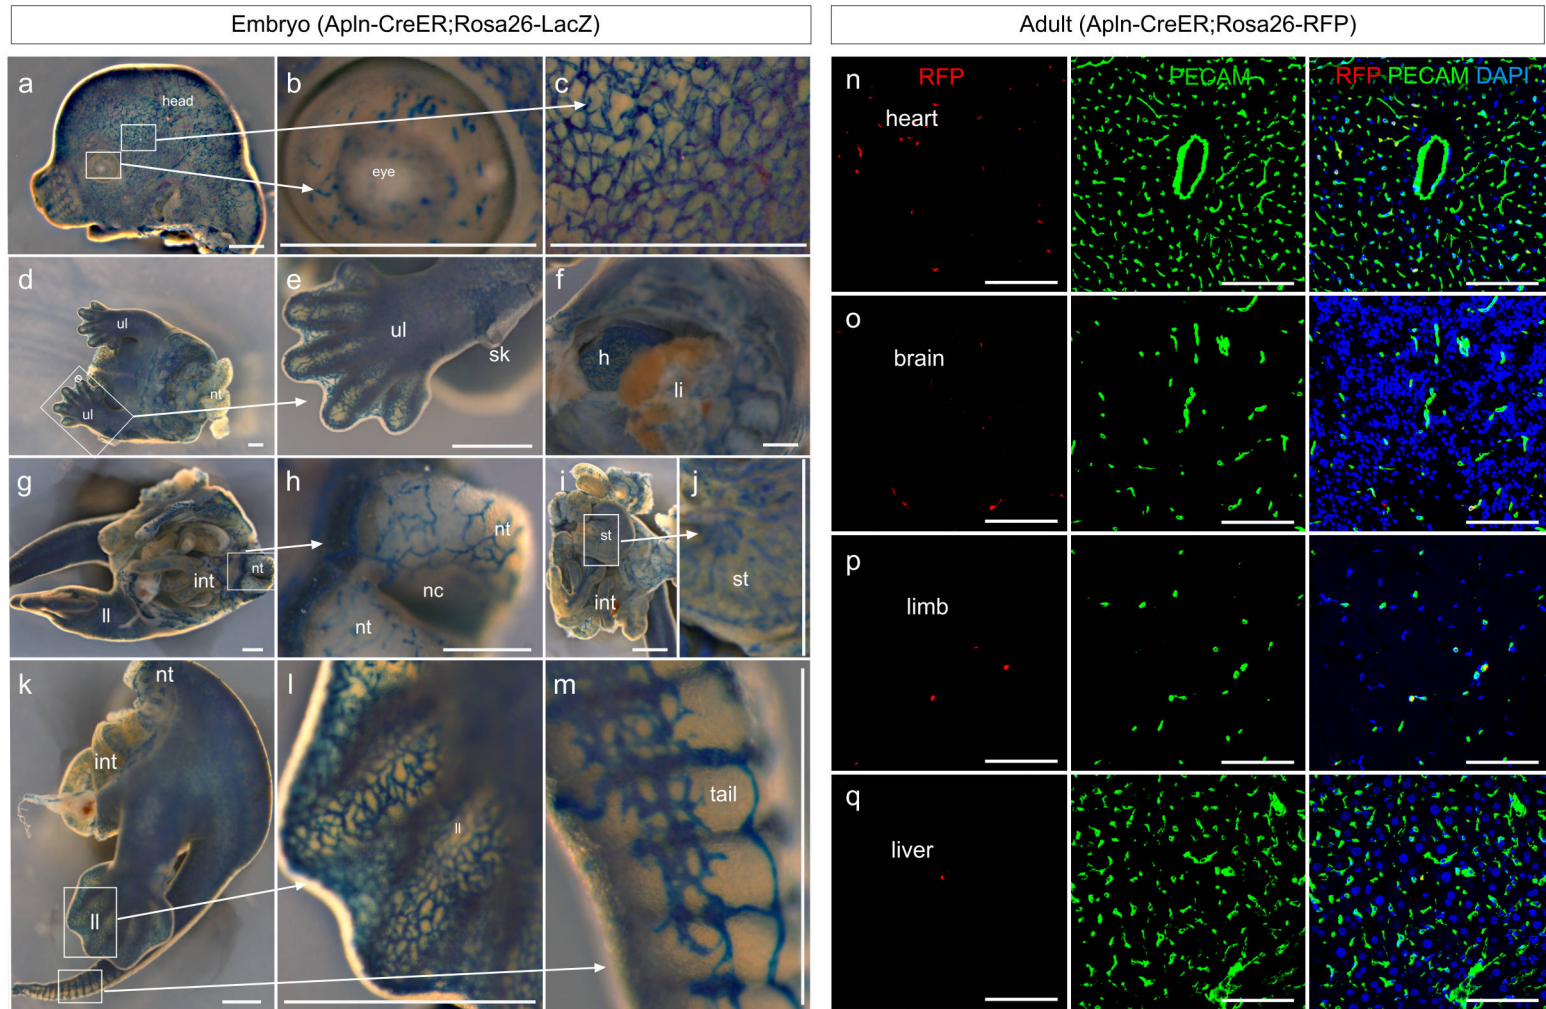

**Supplementary Figure 1. *Apln*-CreER robustly label vascular endothelial cells in the developing embryo, but little activity in the adult. (a-m)** Whole mount view of E13.5 *Apln*-CreER;*Rosa26*<sup>LacZ/+</sup> tissues after X-gal staining. Tamoxifen was induced at E10.5. ul, upper limb; nt, neural tube; nc, neural canal; sk, skin; h, heart; li, liver; ll, lower limb; st, stomach; int, intestine. **(n-q)** 11 weeks' old *Apln*-CreER;*Rosa26*<sup>RFP/+</sup> adult mice were treated with tamoxifen, and tissues were harvested 1 week later. Tissue sections were stained with RFP, PECAM and DAPI. Images were representative of 3 individual samples. Scale bars, 1 mm in **a-m**; 100  $\mu$ m in **n-q**.

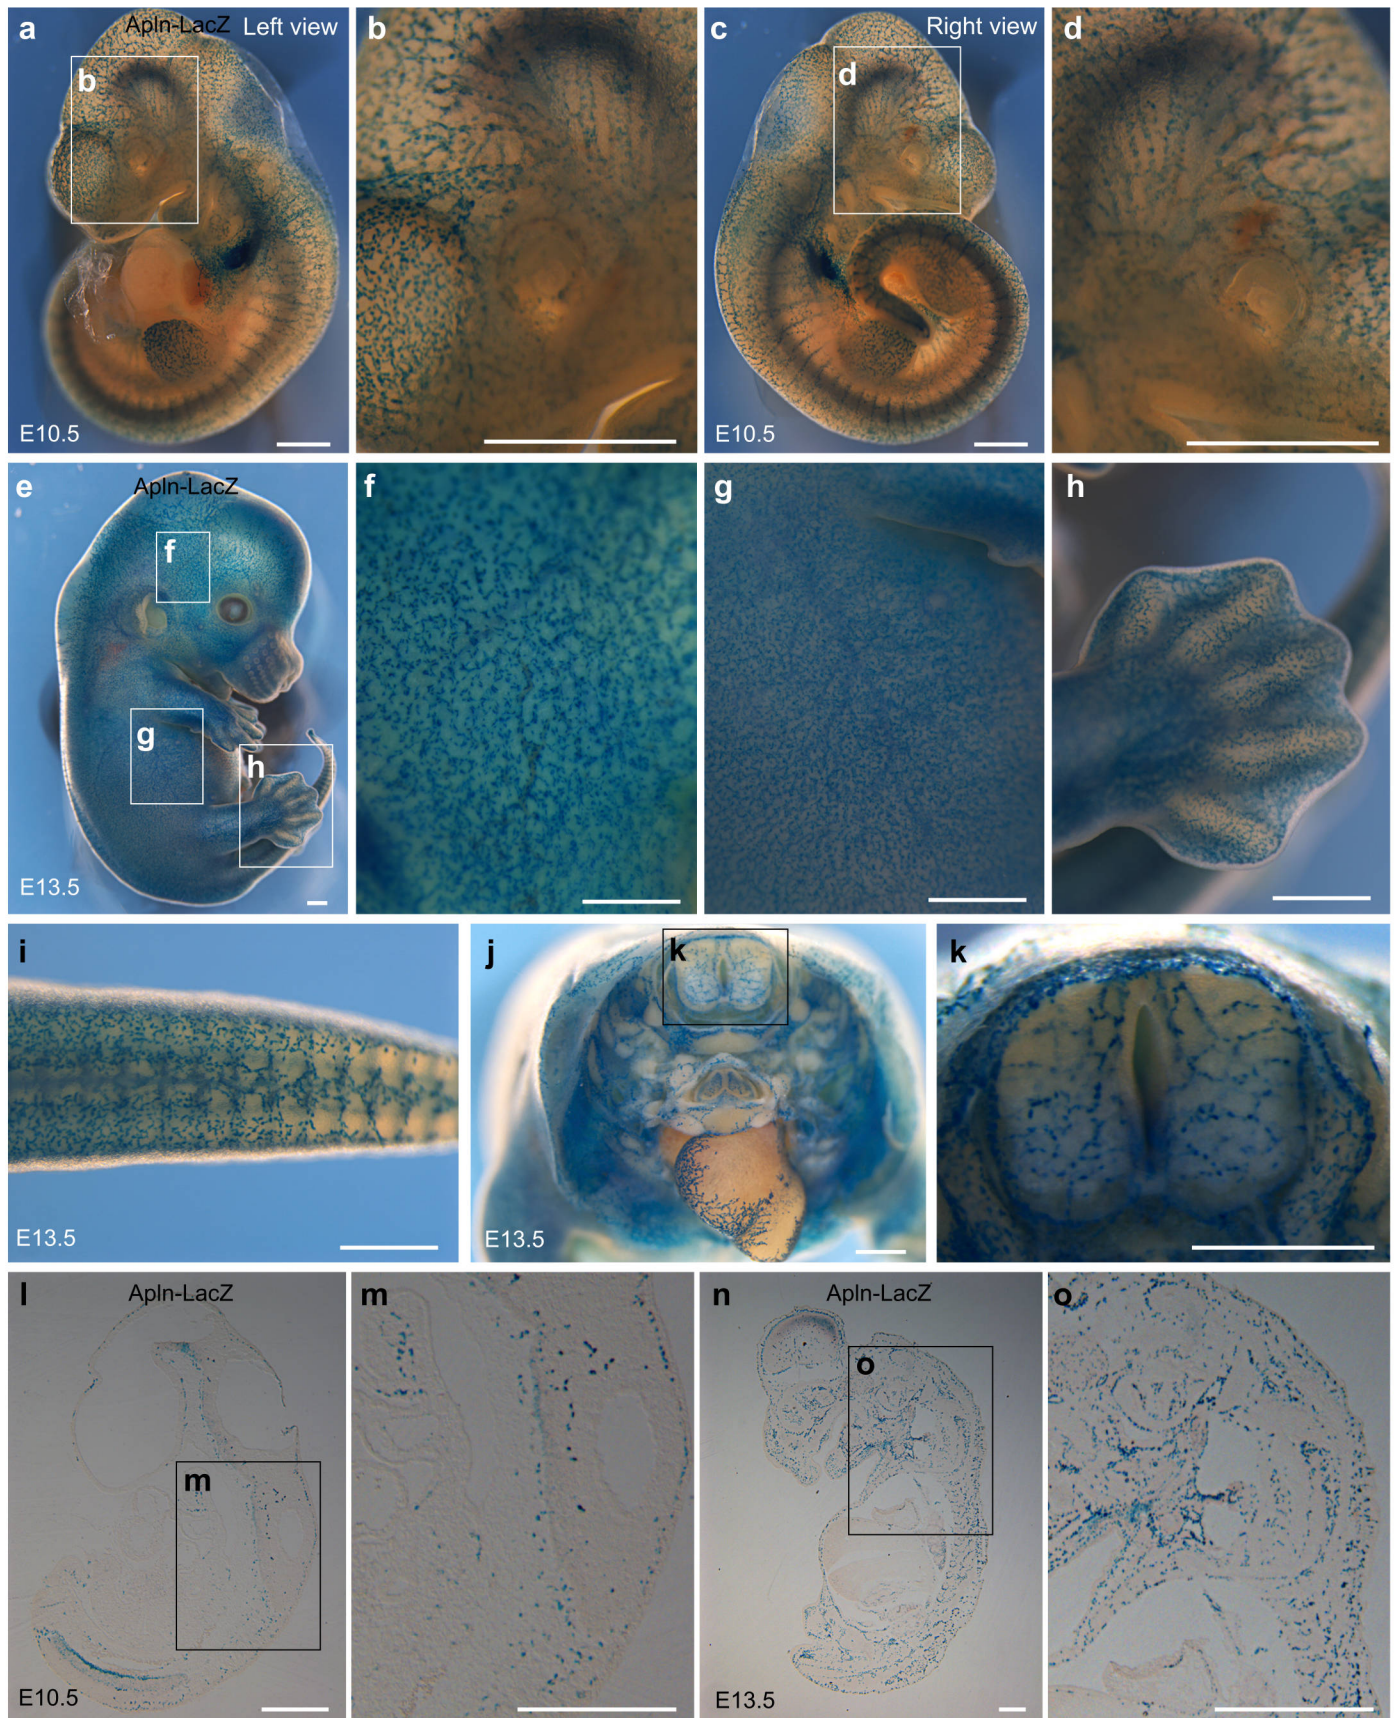

**Supplementary Figure 2. Expression of APLN in E10.5 and E13.5 embryos.** (a-d) Wholemount X-gal staining of E10.5 Aplin-LacZ embryos. (e-k) Wholemount X-gal staining of E13.5 Aplin-LacZ embryos. (l-o) X-gal staining of E10.5 and E13.5 Aplin-LacZ embryonic sections. n = 4 to 5 embryos examined at each time point. Scale bars, 500 μm.

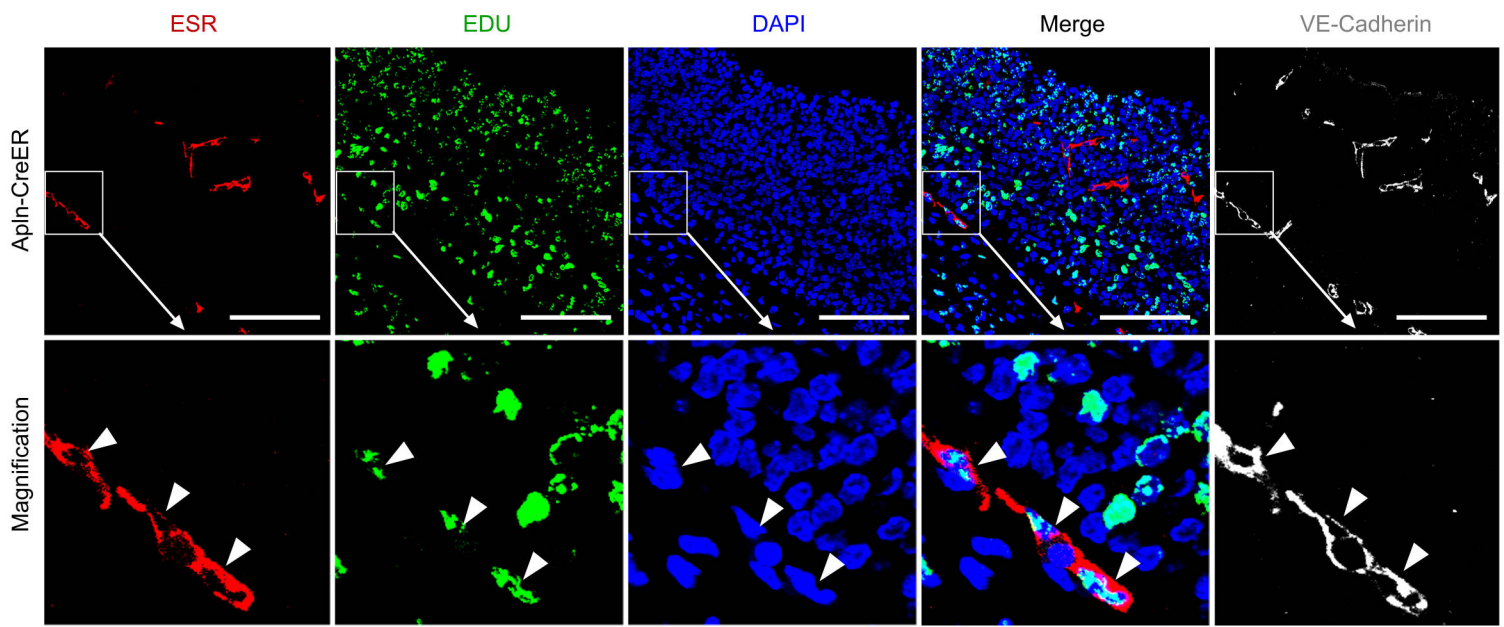

**Supplementary Figure 3. APLN<sup>+</sup> cells are proliferating endothelial cells in E10.5 embryos.** Immunostaining of ESR, EDU, VE-Cadherin and DAPI on E10.5 APLN-CreER embryos. Representative of 3 individual samples. Scale bars, 100  $\mu$ m.

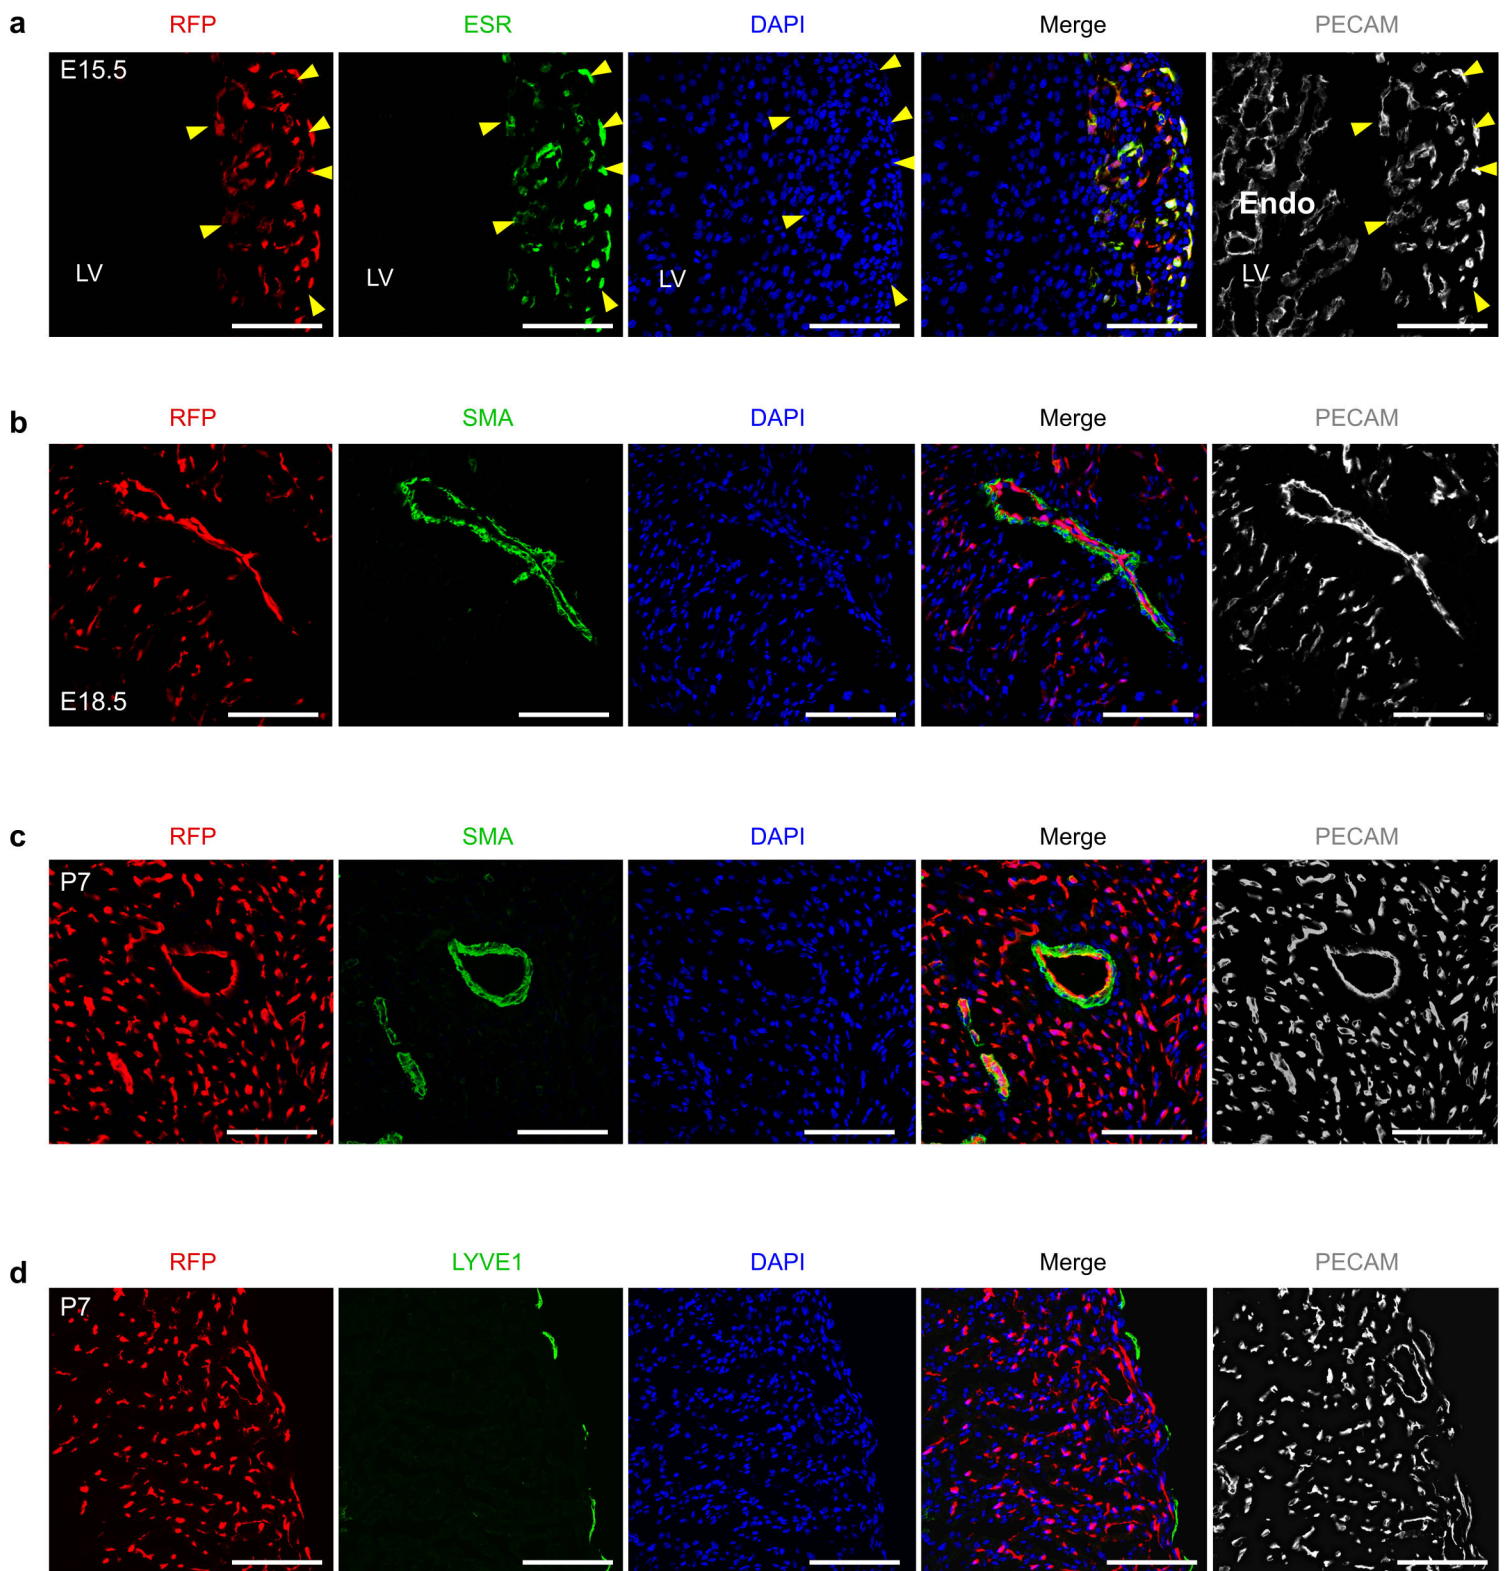

**Supplementary Figure 4. ApIn-CreER specifically label vascular endothelial cells.** (a) ApIn-CreER labels coronary vascular endothelial cells (yellow arrowheads), but not endocardial endothelial cells (Endo). (b, c) ApIn-CreER does not label SMA<sup>+</sup> vascular smooth muscle cells. (d) ApIn-CreER does not label LYVE1<sup>+</sup> lymphatic vascular endothelial cells. Tamoxifen was induced at E10.5. Each figure is representative of 3 individual samples. Scale bars, 100  $\mu$ m.

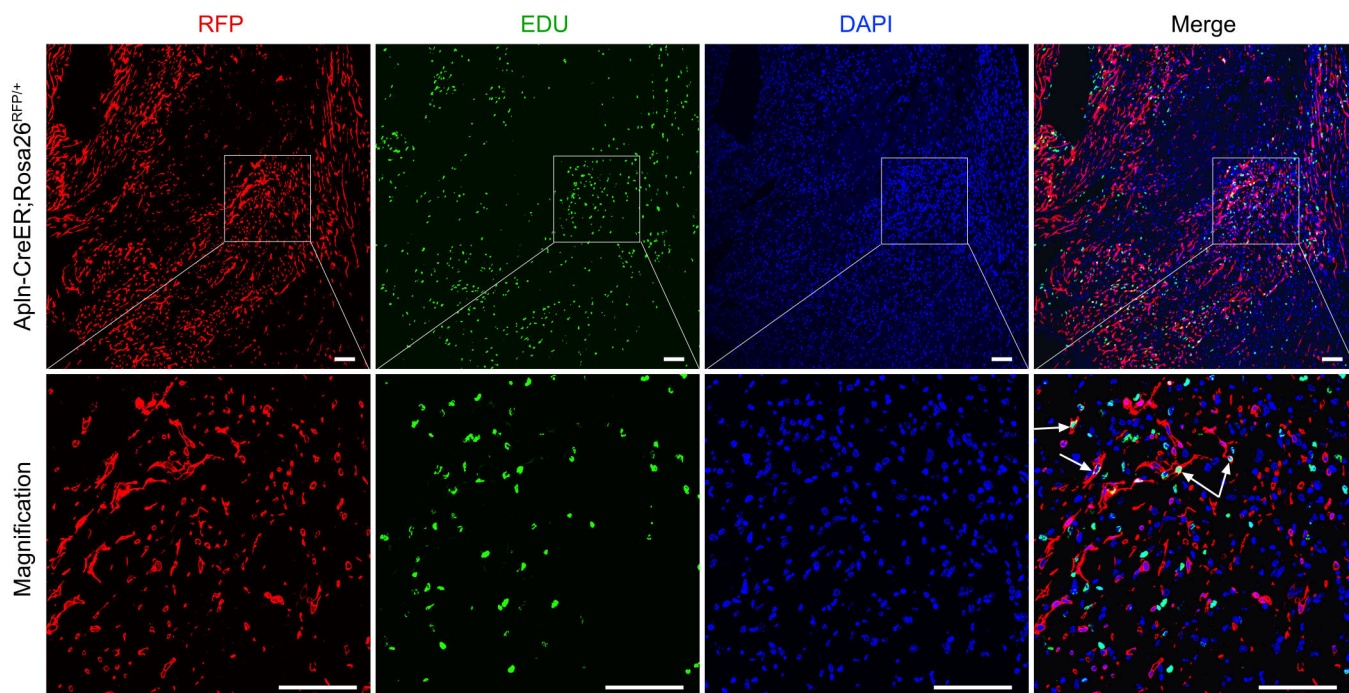

**Supplementary Figure 5. Proliferation of *Apln-CreER* labeled vascular endothelial cells in MI region.** Immunostaining of RFP, EDU and DAPI on heart sections 3 days after injury. 6.22% RFP<sup>+</sup> endothelial cells were EDU<sup>+</sup> in heart tissues. EDU was injected intraperitoneally 24 hours before heart retrieval. Each image is representative of 3 individual samples. Scale bar, 200  $\mu$ m.

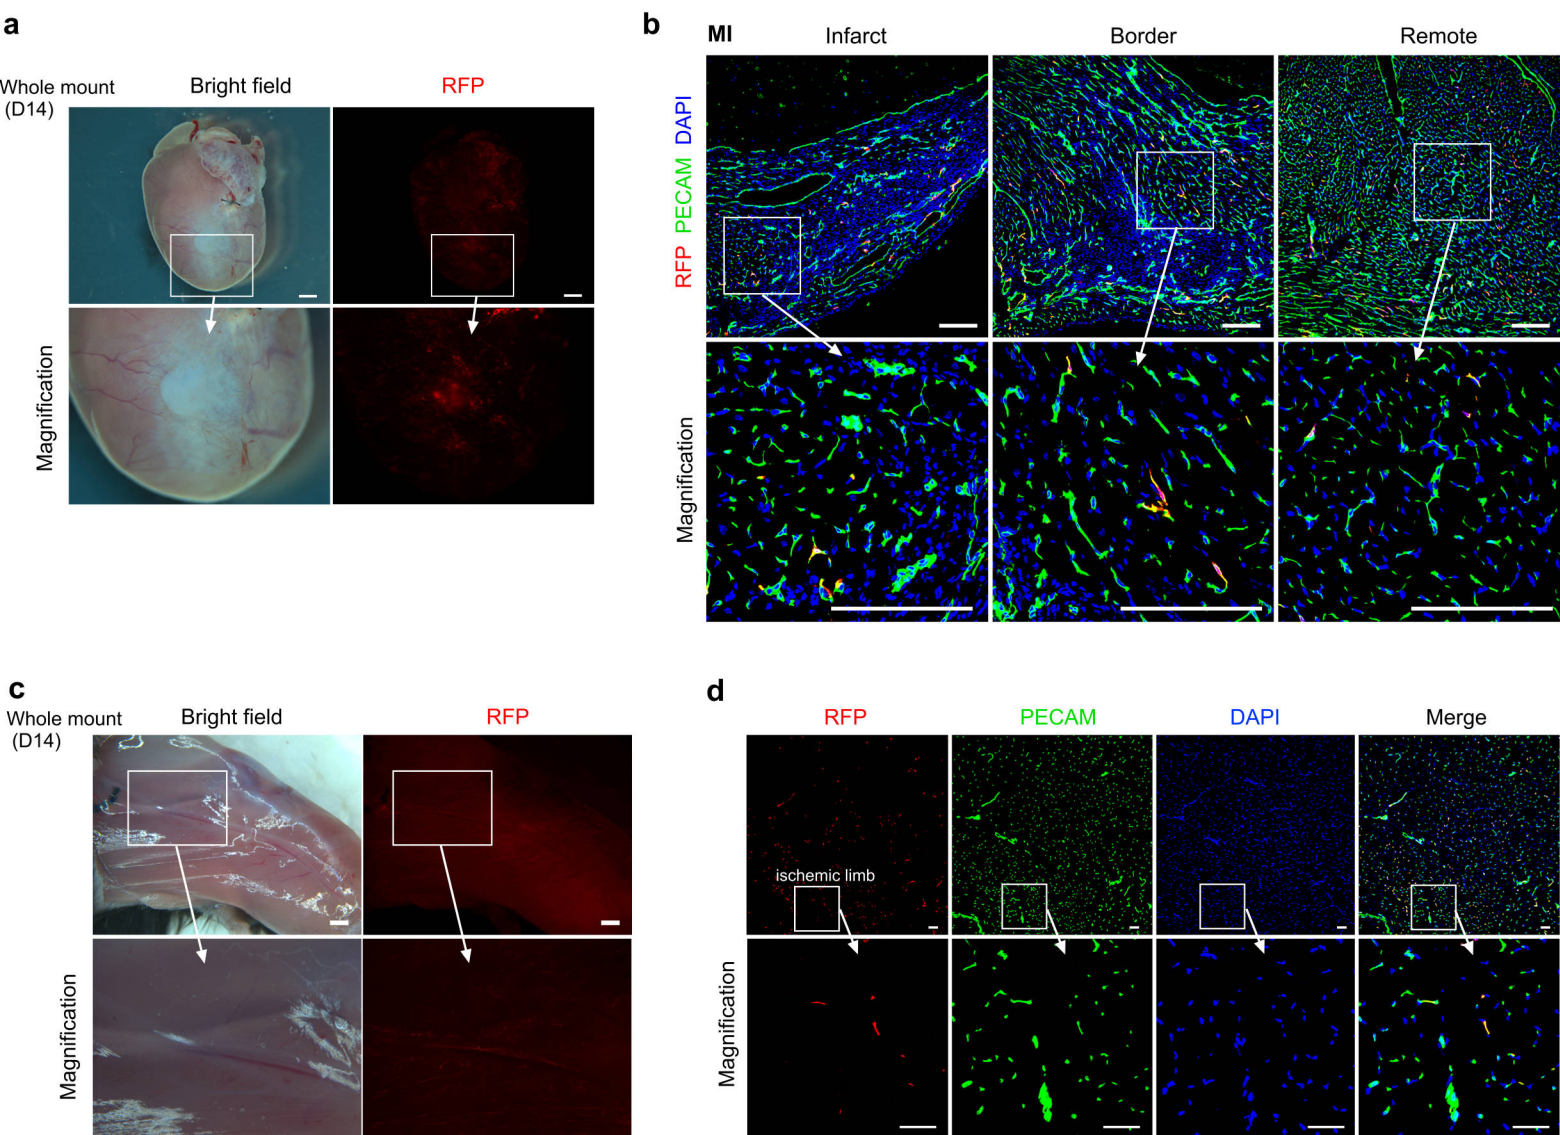

**Supplementary Figure 6. Leakiness of *Apln*-CreER in endothelial cells labeling in heart and limb.** (a) Whole mount view of *Apln*-CreER;*Rosa26*<sup>RFP/+</sup> heart 14 days after MI. No tamoxifen was treated. (b) Immunostaining of RFP, PECAM and DAPI on *Apln*-CreER;*Rosa26*<sup>RFP/+</sup> heart 14 days after MI. No tamoxifen was treated. Image is representative of four individual hearts. (c) Whole mount view of the hindlimb at 14 days post hindlimb ischemia. *Apln*-CreER;*Rosa26*<sup>RFP/+</sup> mice did not receive tamoxifen after injury. (d) Immunostaining of the lineage marker RFP, PECAM and DAPI in the injured hindlimb in the absence of tamoxifen treatment. White boxed areas are magnified in the panels below. Scale bars, 1 mm in **a,c**; 100  $\mu$ m in **b,d**.

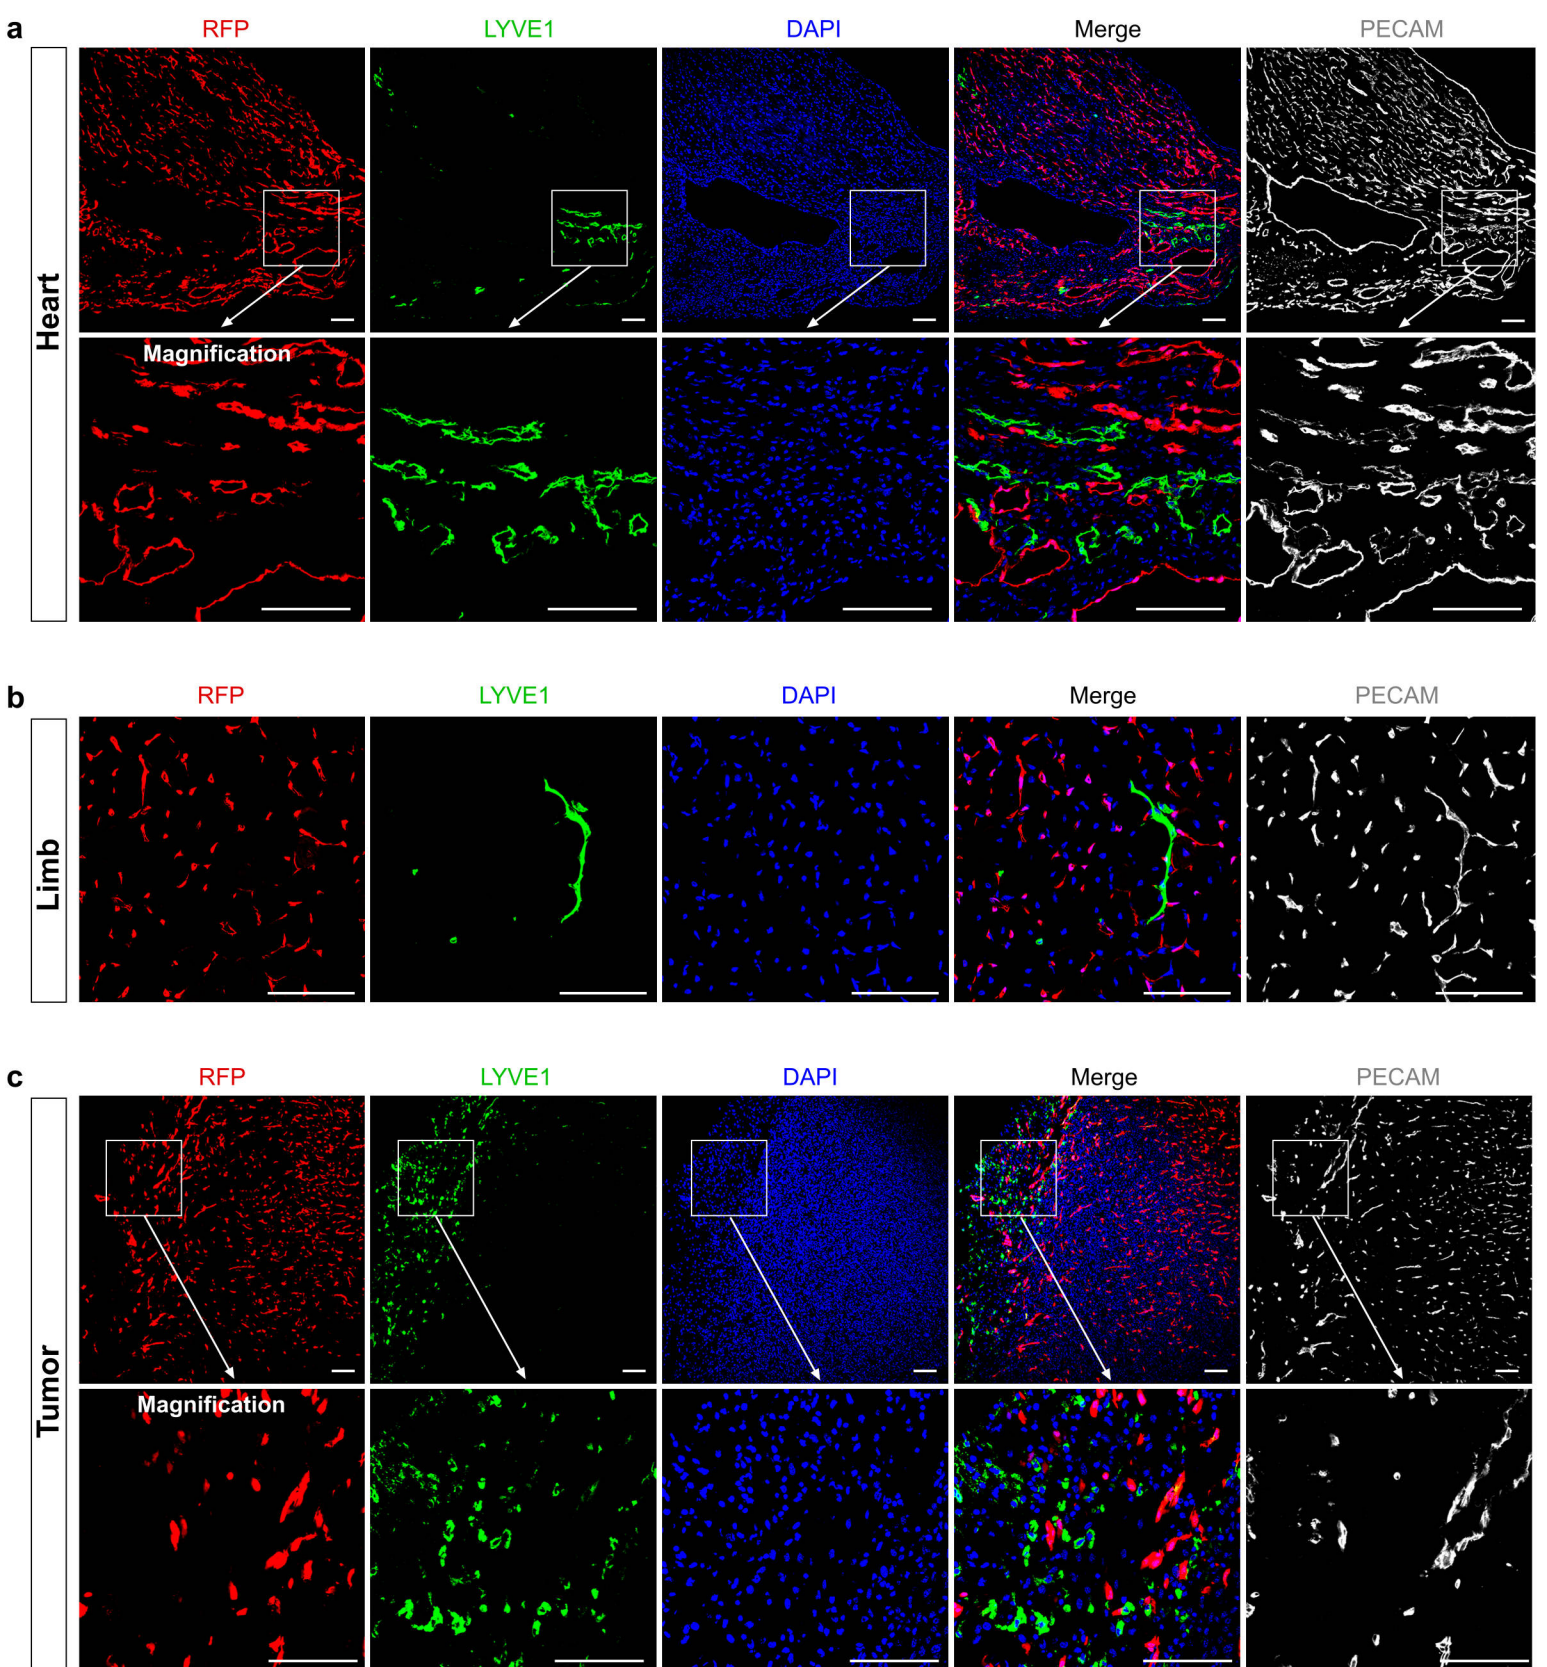

**Supplementary Figure 7. *Apln*-CreER labeled cells do not adopt lymphatic vascular endothelial cell fate.** (a-c) Immunostaining of genetic marker RFP, lymphatic vessel marker LYVE1 and PECAM on ischemic heart, hindlimb tissues and tumor samples. *Apln*-CreER does not label LYVE1<sup>+</sup> lymphatic vascular endothelial cells in injured heart, limb or tumors. Each image was representative of 3 individual samples. Scale bars, 100  $\mu$ m.



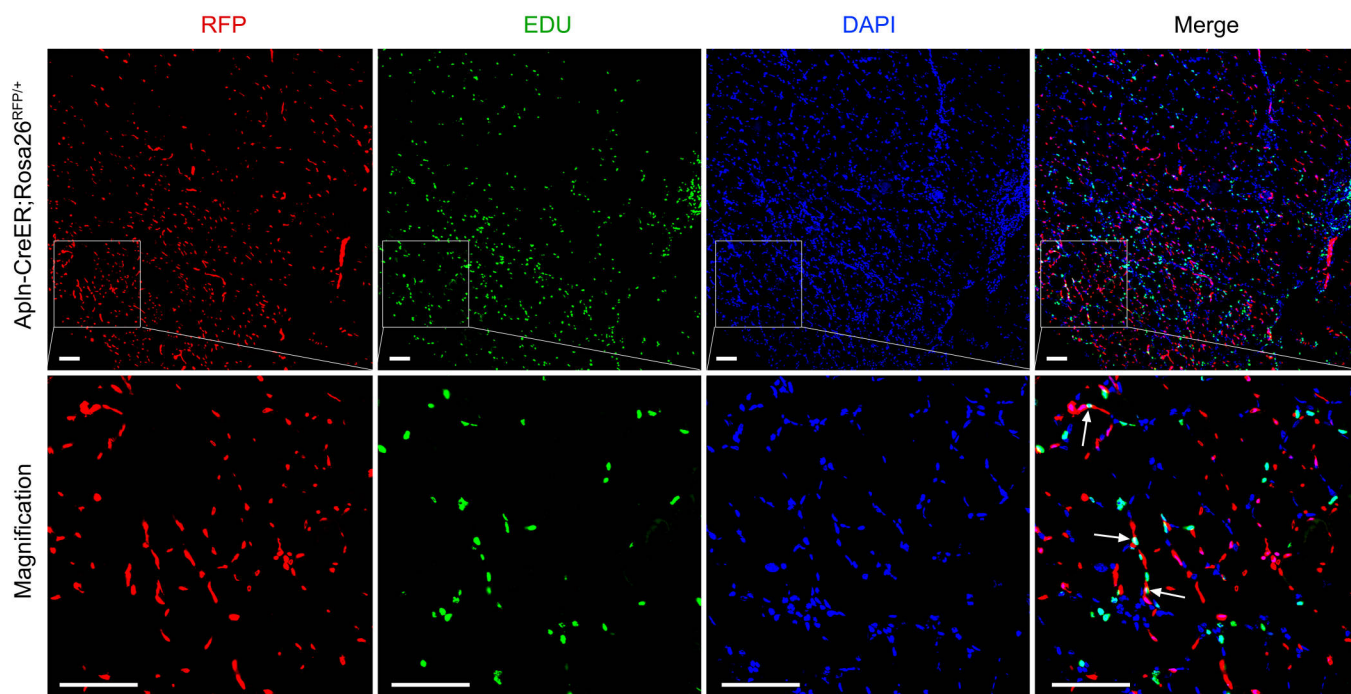

**Supplementary Figure 8. Proliferation of ApIn-CreER labeled vascular endothelial cells in injured hindlimb.** Immunostaining of RFP, EDU and DAPI on hindlimb sections 3 days after injury. 3.85% RFP<sup>+</sup> endothelial cells were EDU<sup>+</sup> in hindlimb tissues. EDU was injected intraperitoneally 24 hours before limb retrieval. Representative of 3 individual samples. Scale bars, 200  $\mu$ m.

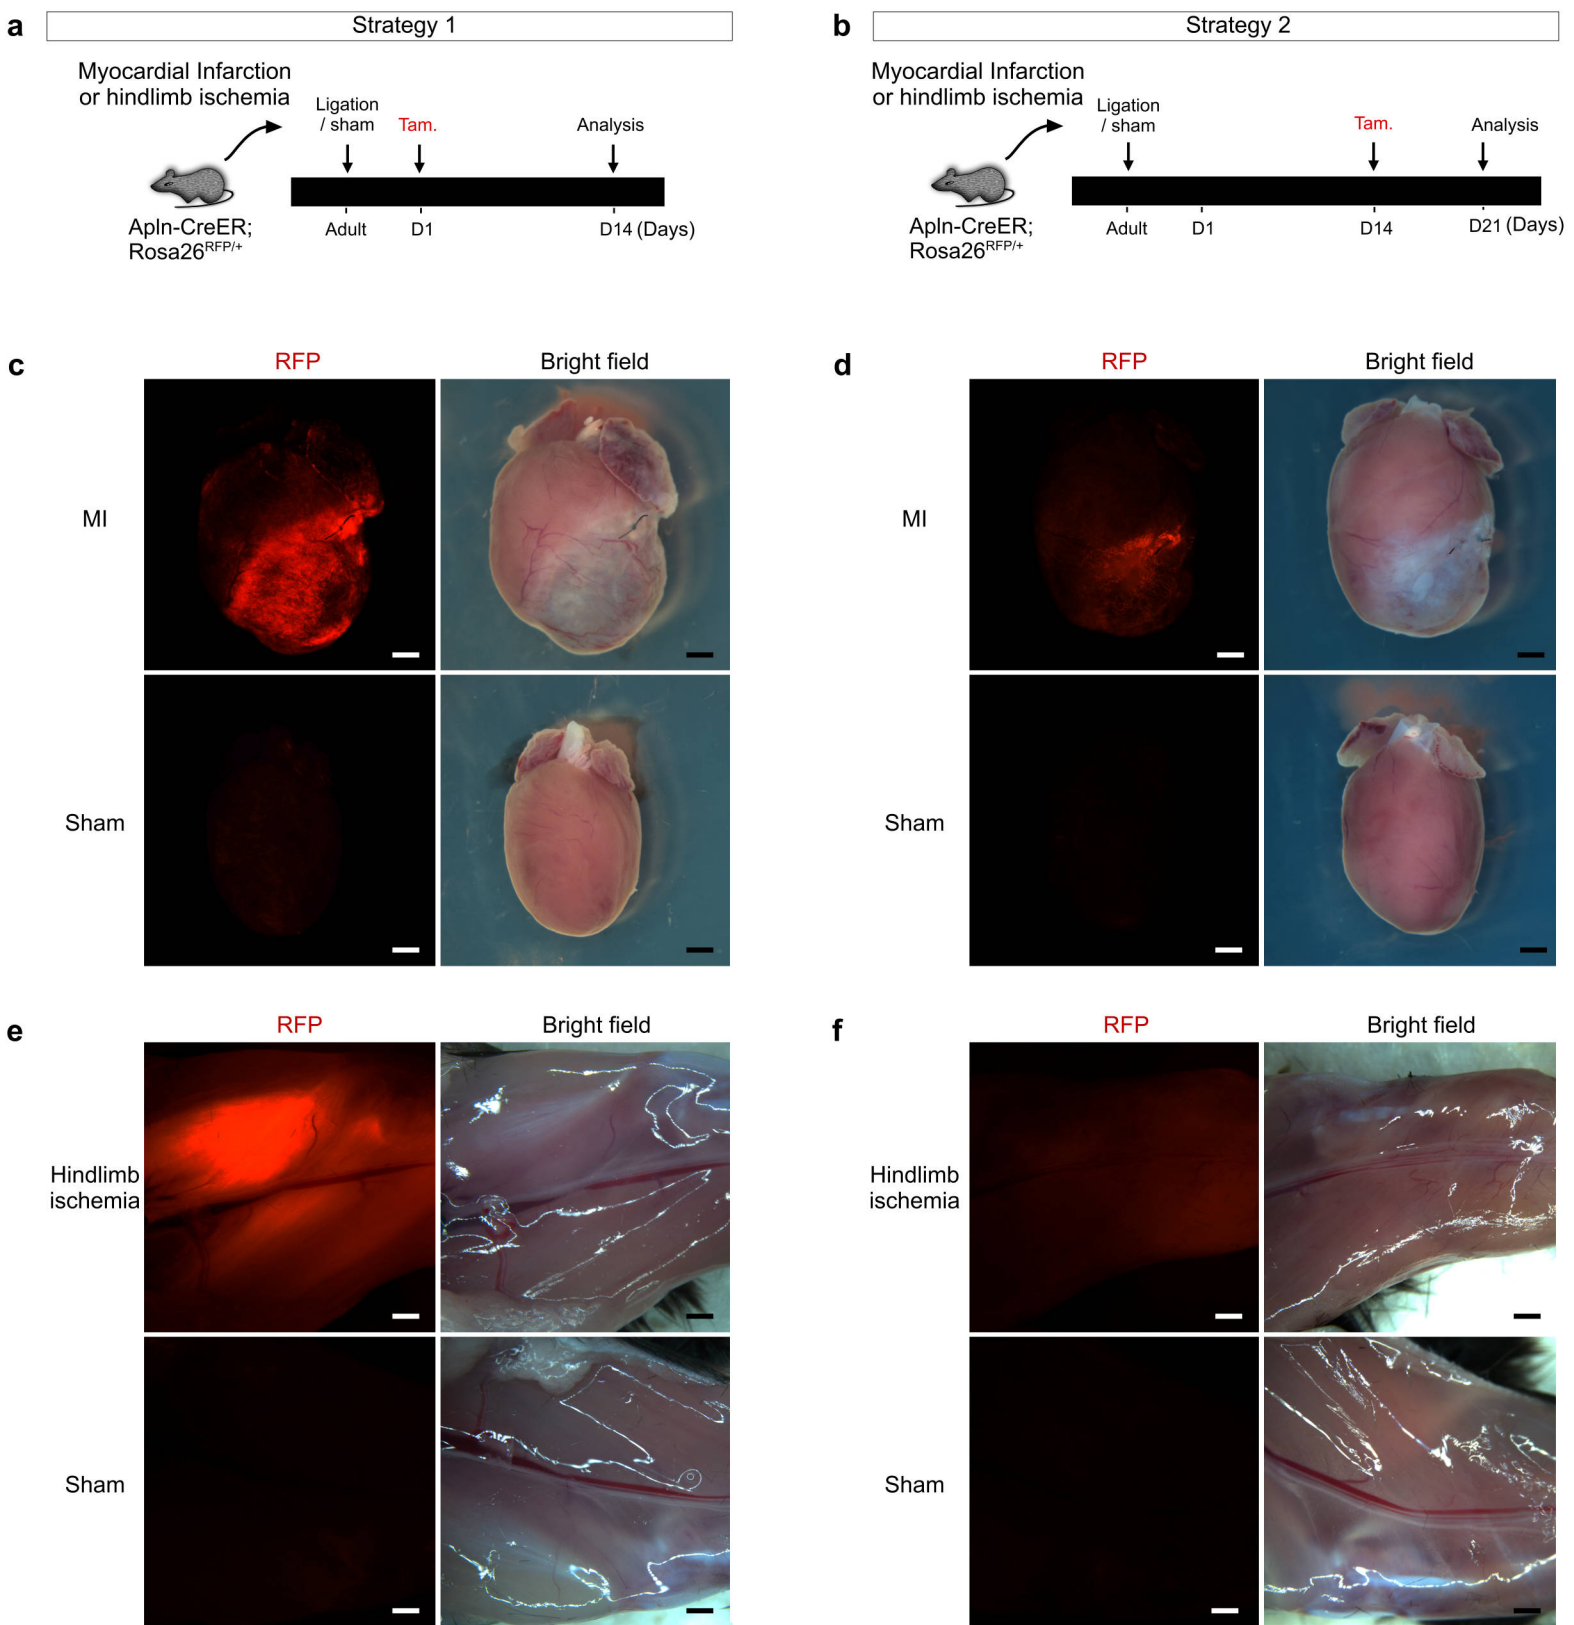

**Supplementary Figure 9. Lower labeling of vessels by tamoxifen treatment at 2 weeks after injury.** (a, b) Schematic figures showing two different strategies of tamoxifen induction. (c, d) Wholemount fluorescence or bright field pictures of hearts after MI or sham treatment. Compared with MI heart in strategy 1, the MI heart in strategy 2 have reduced RFP signal, indicating lower labeling of vessels when tamoxifen was administered at two weeks after MI. (e, f) Wholemount fluorescence or bright field pictures of hindlimbs after ligation or sham treatment. Compared with injured hindlimb in strategy 1, the injured hindlimb in strategy 2 have reduced RFP signal, indicating lower labeling of vessels when tamoxifen was administered at two weeks after ligation. Representative of at least 3 samples per group. Scale bars, 1 mm.

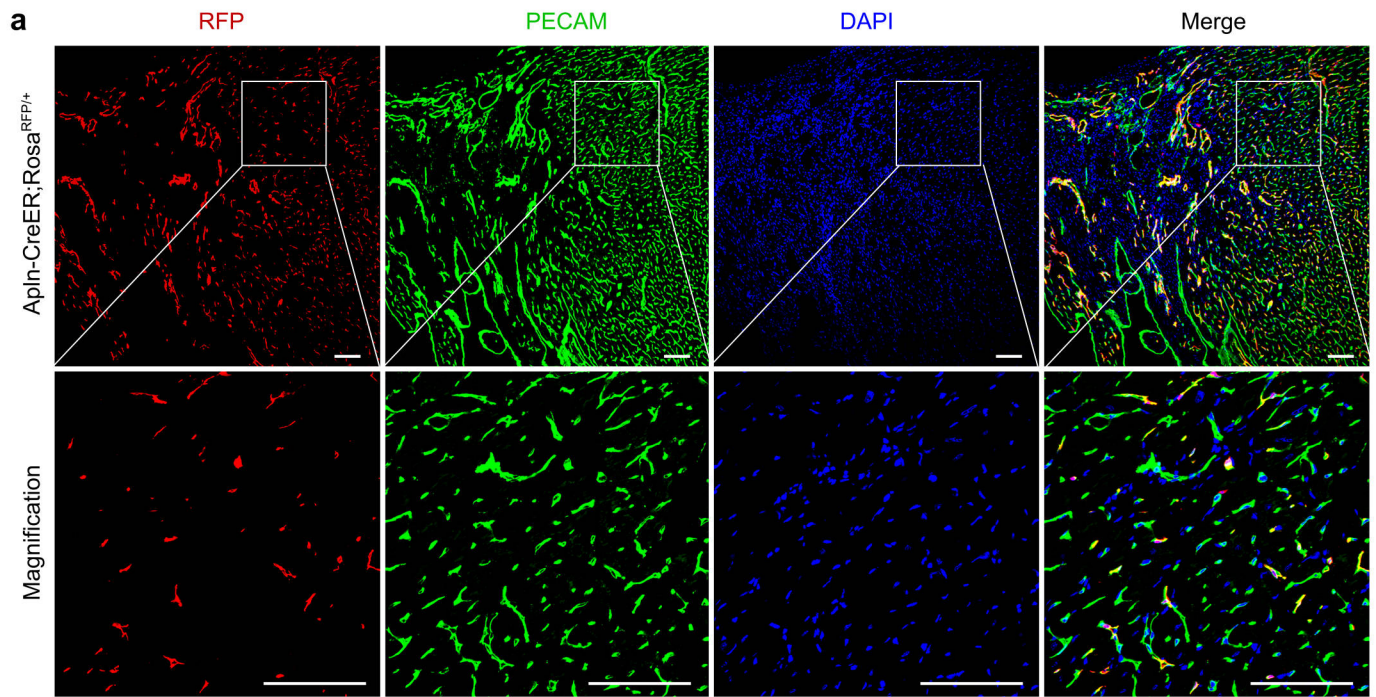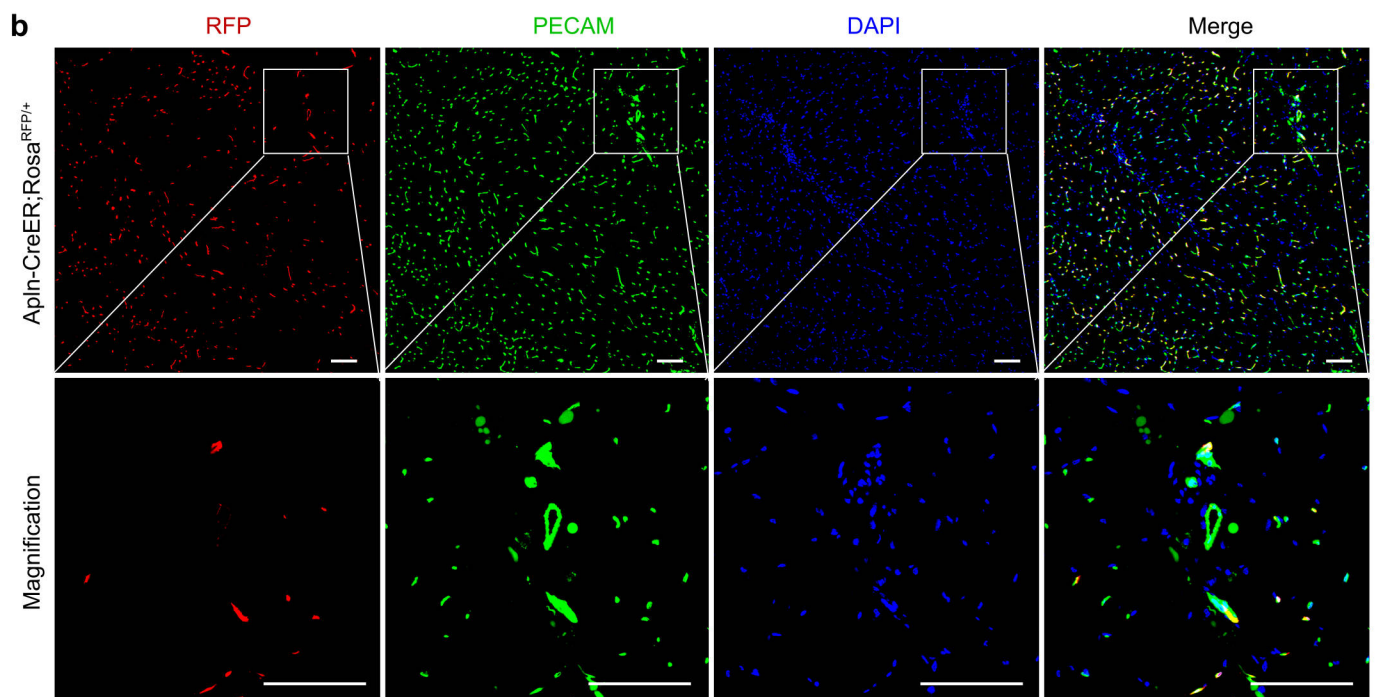

**Supplementary Figure 10. Apln-CreER labeled vascular endothelial cells. (a-b)** Immunostaining of RFP, PECAM and DAPI on Apln-CreER;Rosa<sup>RFP/+</sup> mice at three weeks after MI (a) or hindlimb ischemia (b). Tamoxifen was induced at two weeks after MI or hindlimb ischemia. Representative of 3 individual samples. Scale bars, 100  $\mu$ m.

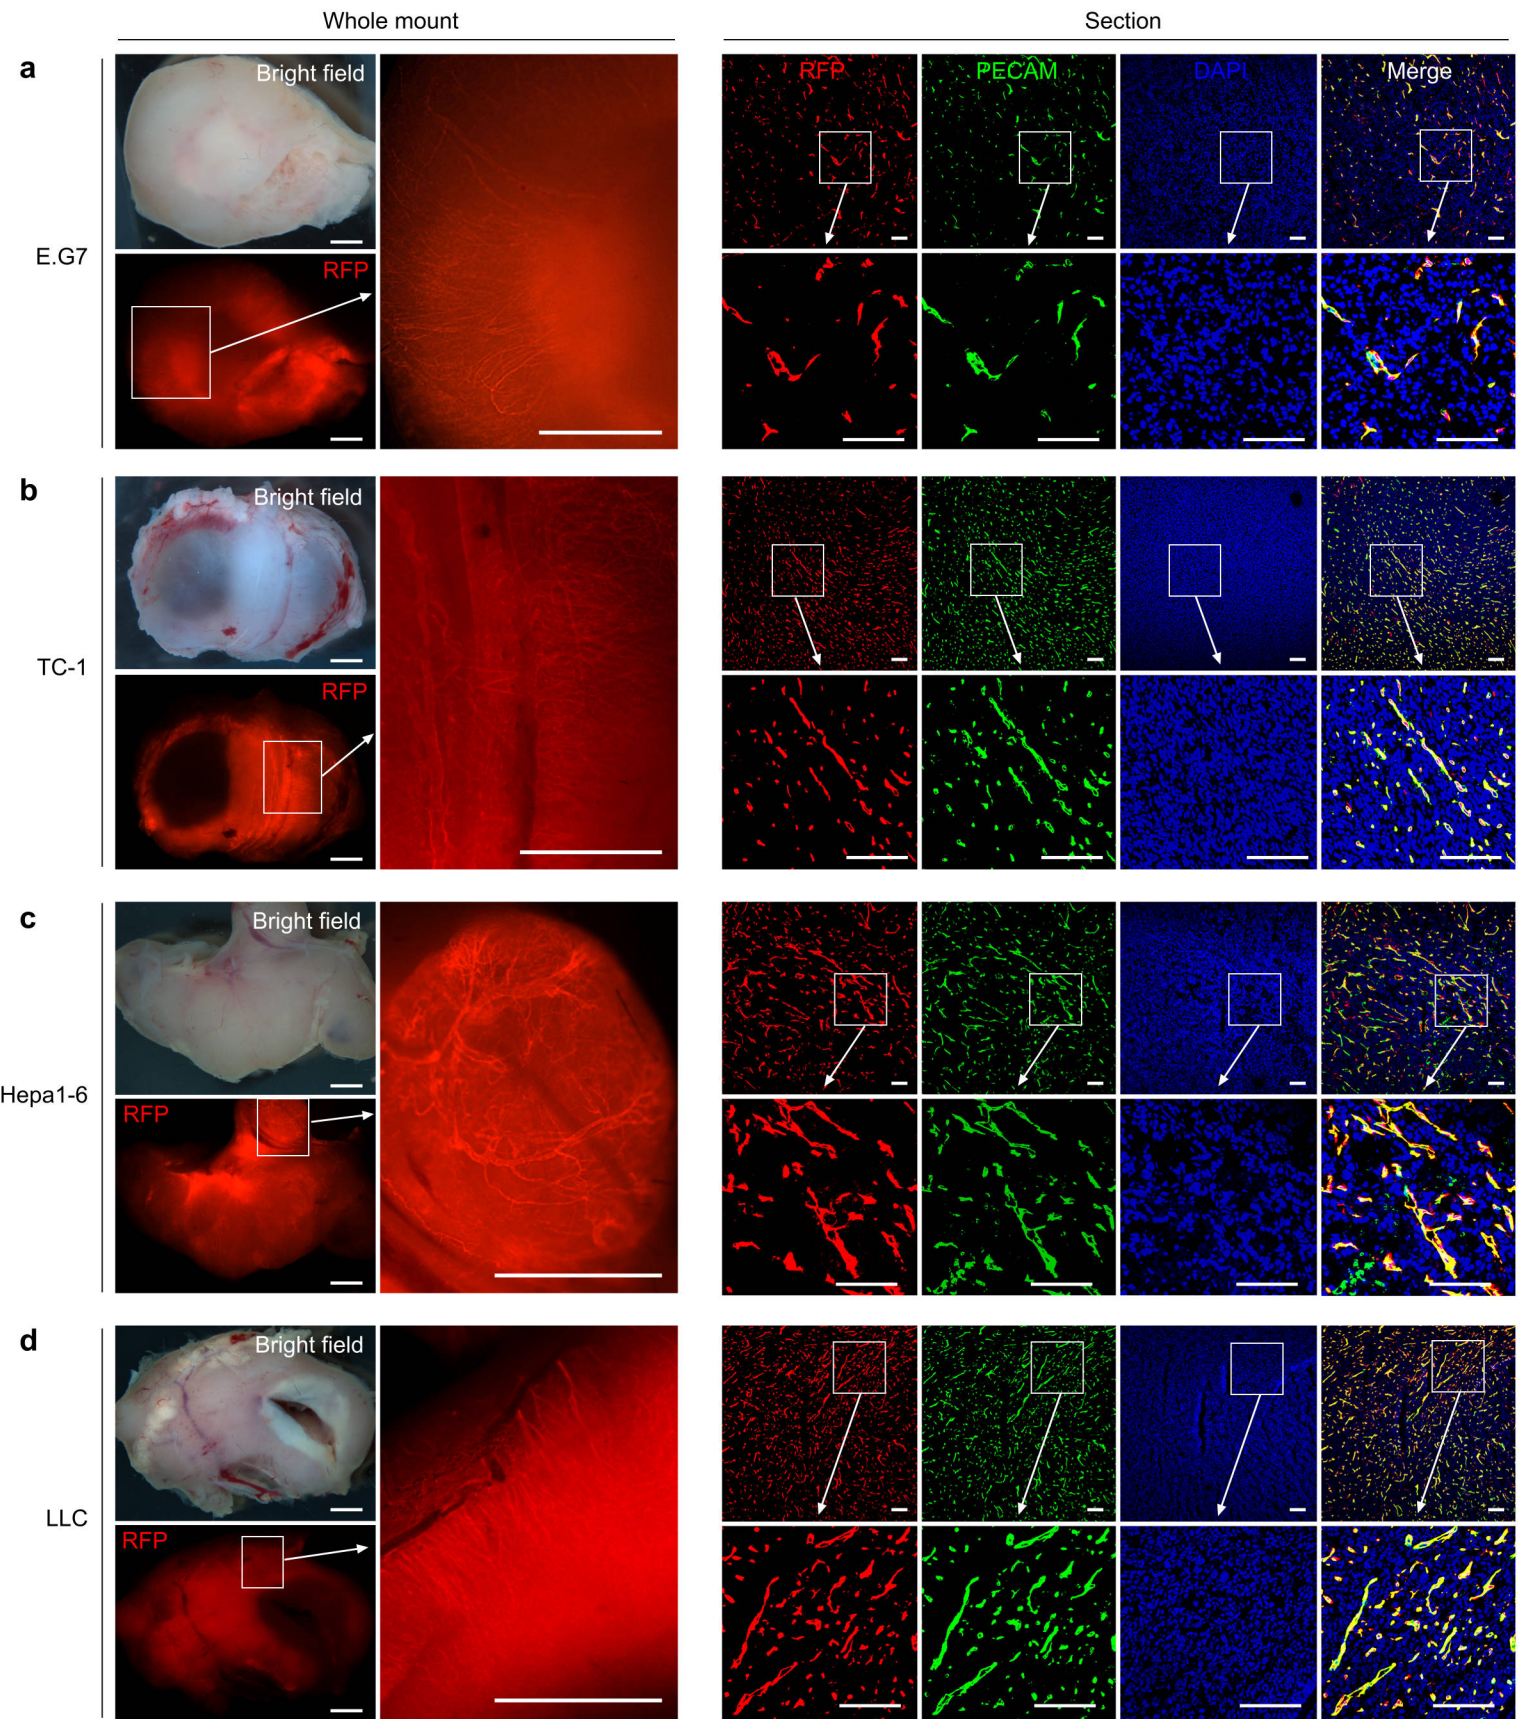

**Supplementary Figure 11. *Apln*-CreER efficiently labels tumor-induced vascular ECs.** (a-d) Whole mount phase contrast, whole mount live fluorescence, and indirect immunofluorescent staining for RFP and PECAM on sectioned tissue (left to right, respectively) showed *Apln*-CreER strongly labels tumor ECs. Tumors were generated by subcutaneous implant of oncogenic cell lines in *Apln*-CreER;*Rosa26<sup>RFP/+</sup>* adult mice. Tamoxifen was administered 1 day following implant. Four different tumor cell lines (E.G7, TC-1, Hepa1-6 and LLC) were tested. Each image is representative of at least four individual samples. Scale bars, 1 mm in a-d whole mount images; 100  $\mu$ m in a-d section images.

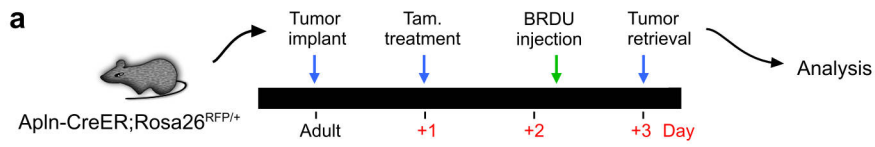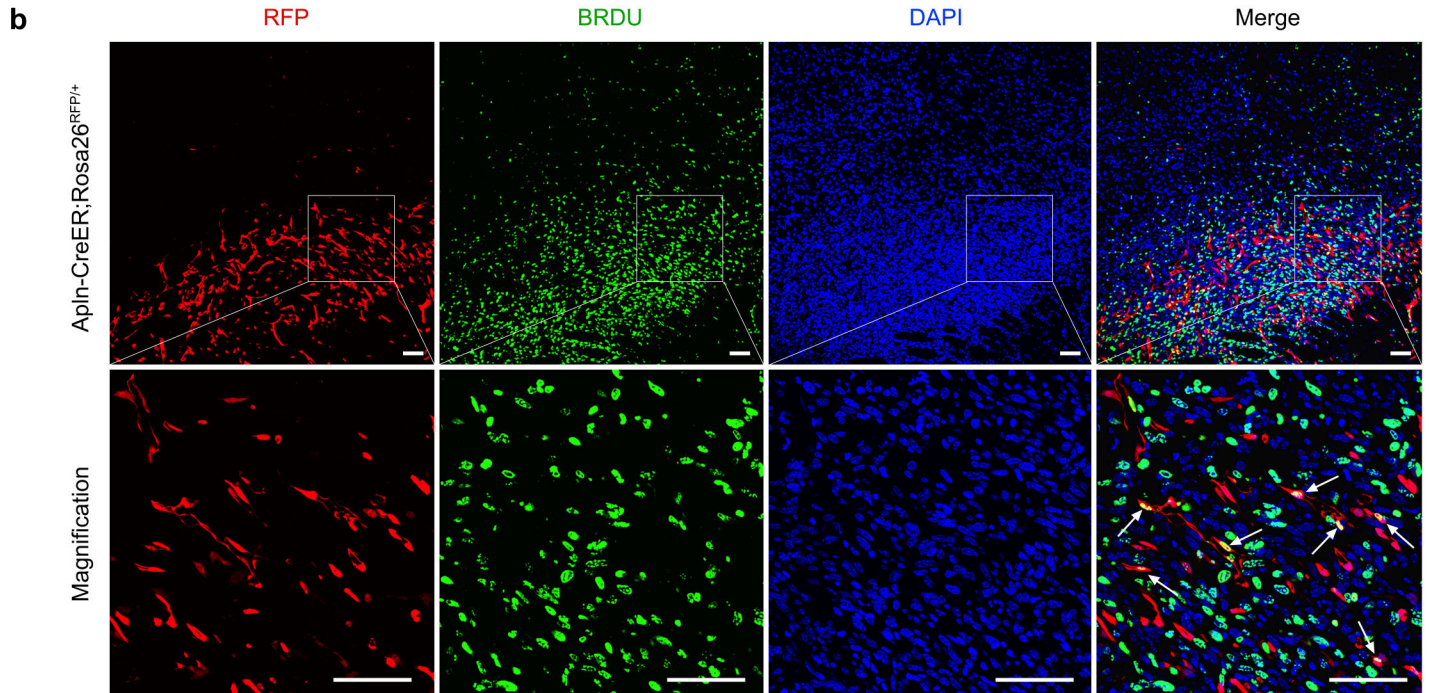

**Supplementary Figure 12. Proliferation of ApIn-CreER labeled vessels in tumor.** (a) Strategy of tumor implantation and tamoxifen treatment in ApIn-CreER; Rosa26<sup>RFP/+</sup> mice. (b) Immunostaining of RFP, BRDU and DAPI on tumor samples showed 19.56% proliferating endothelial cells (BRDU<sup>+</sup>) among RFP<sup>+</sup> cells (white arrows). n = 3. Scale bars, 200  $\mu$ m.

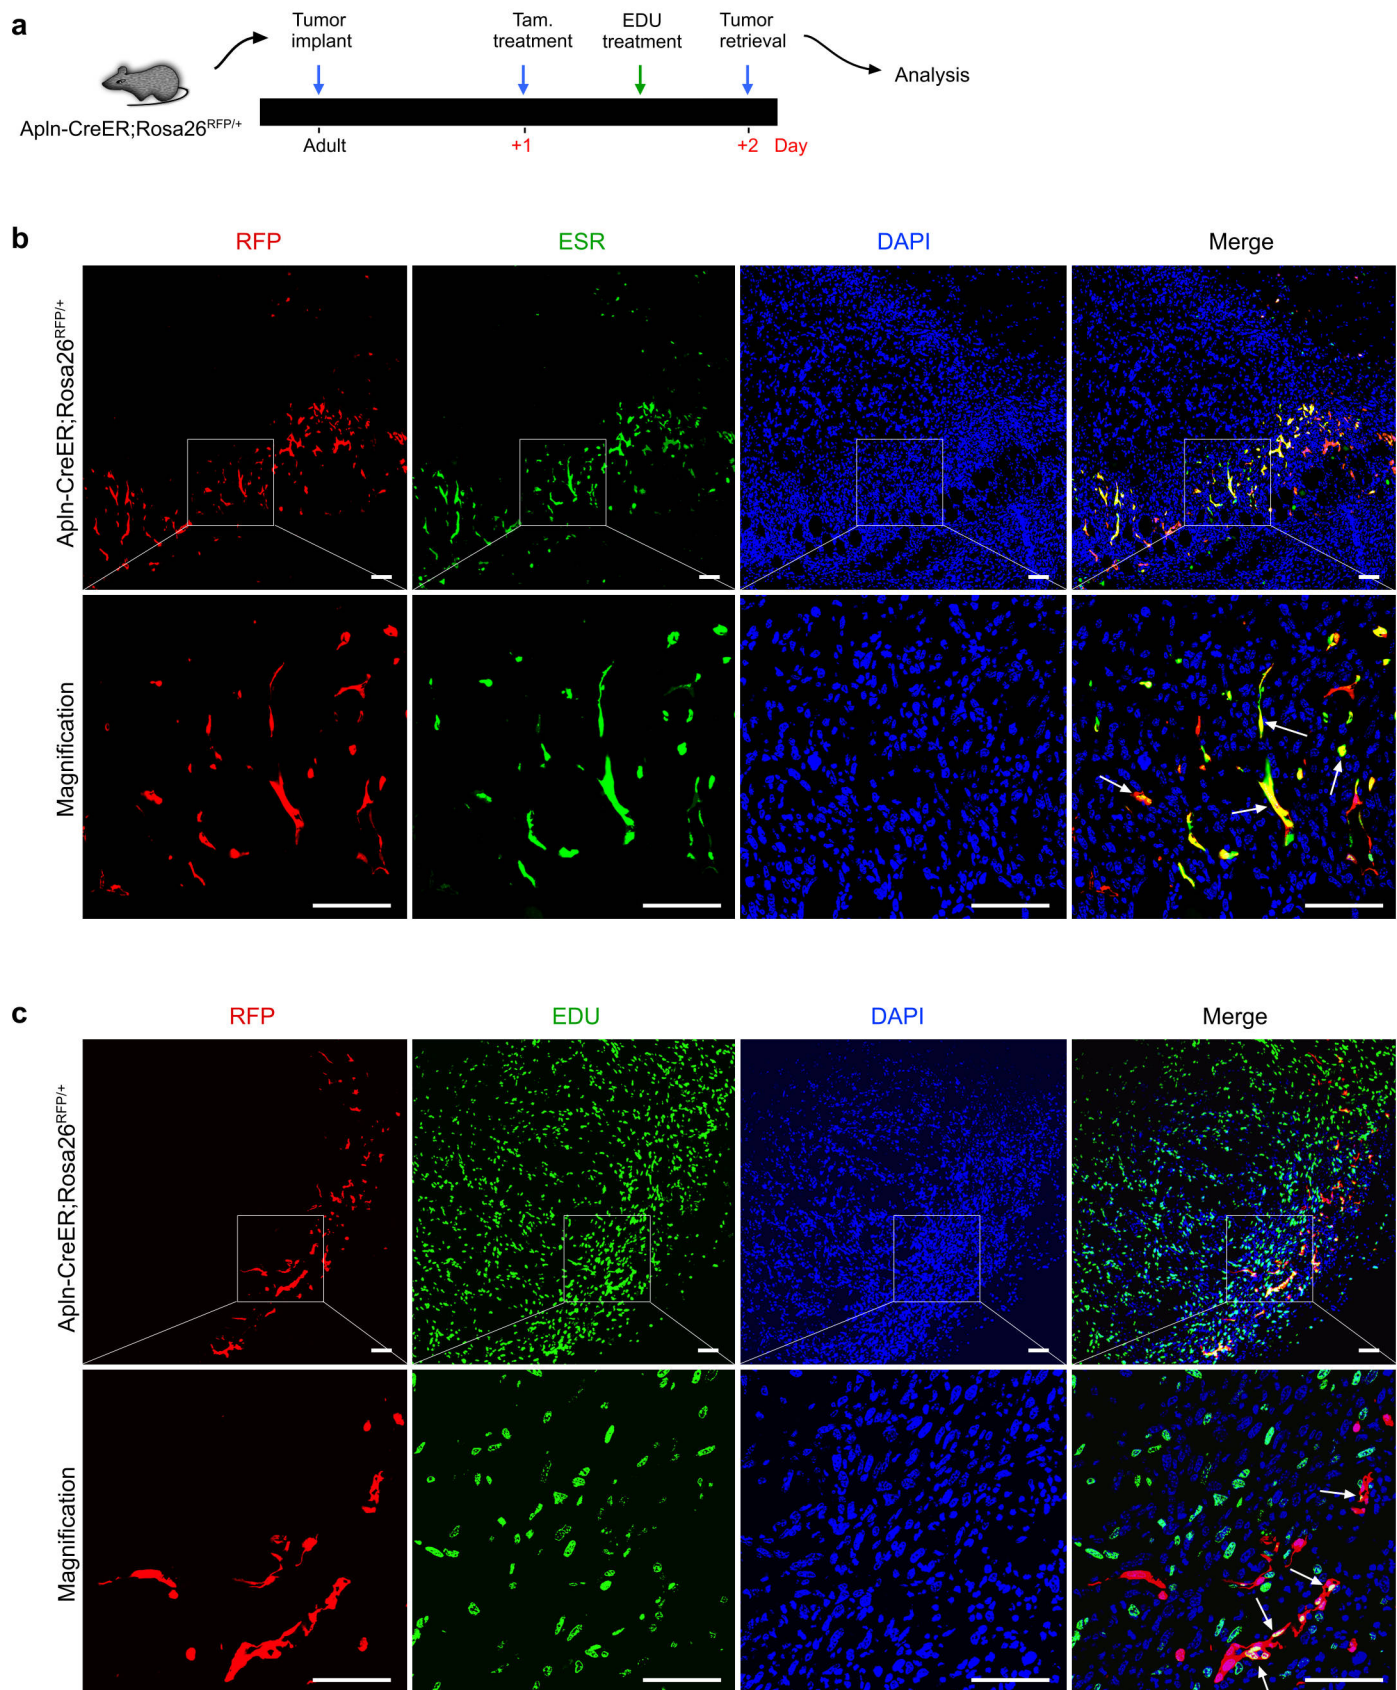

**Supplementary Figure 13. ApIn-CreER labeled preliminary vessels in tumor.** (a) Strategy of tumor implantation, tamoxifen induction and EDU treatment in ApIn-CreER; Rosa26<sup>RFP/+</sup> mice. (b) RFP, ESR and DAPI staining of tumor samples retrieved two days after implantation. Most ApIn-derived cells (RFP<sup>+</sup>) were expressing APLN (detected by ESR, white arrows). (c) Immunostaining of RFP, EDU and DAPI on tumor samples showed 11.48% proliferating endothelial cells (EDU<sup>+</sup>) among RFP<sup>+</sup> cells (white arrows). n = 3. Scale bars, 200  $\mu$ m.

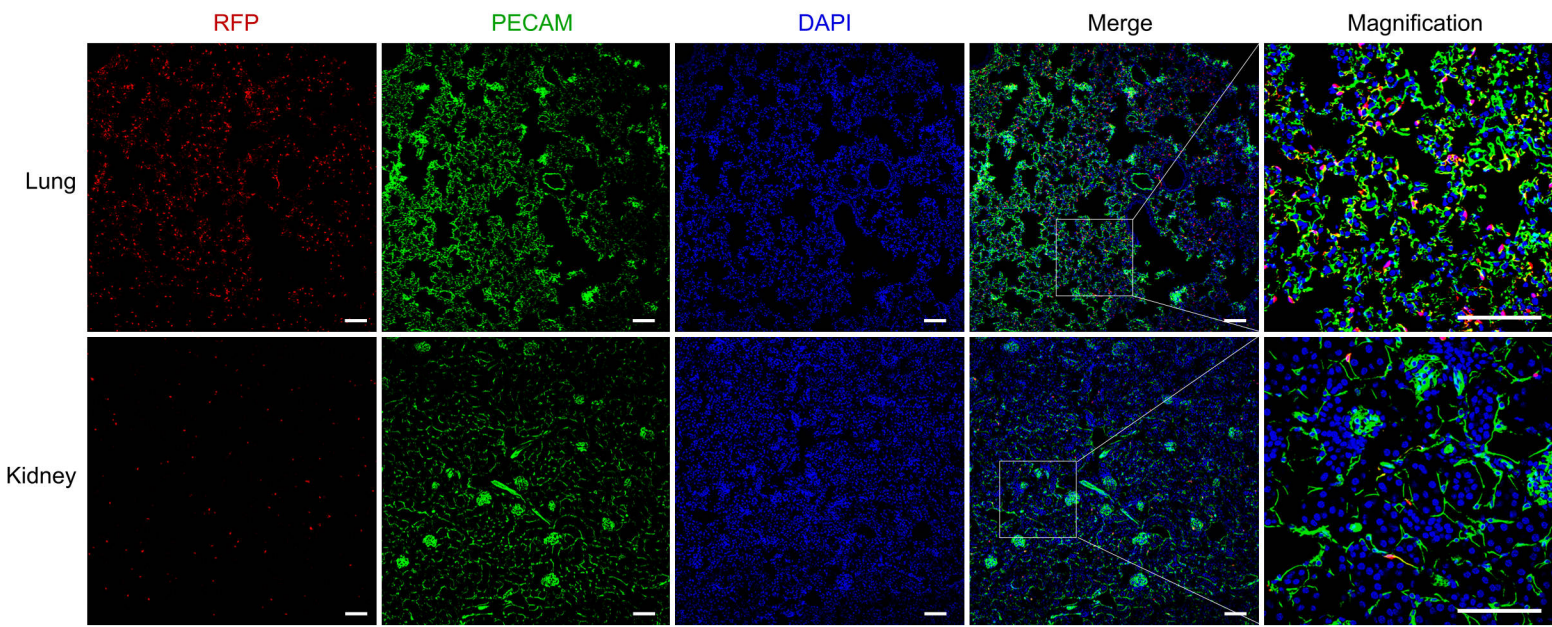

**Supplementary Figure 14. ApIn-CreER lineage tracing in lung and kidney.** Immunostaining of lineage marker RFP, vascular endothelial cell marker PECAM and nuclei marker DAPI on ApIn-CreER;Rosa26<sup>RFP/+</sup> tissue sections. Tamoxifen was treated about 10 days before analysis. ApIn-CreER labels 30.11% and 4.75% vascular endothelial cells in lung and kidney respectively. Scale bars, 100  $\mu$ m.

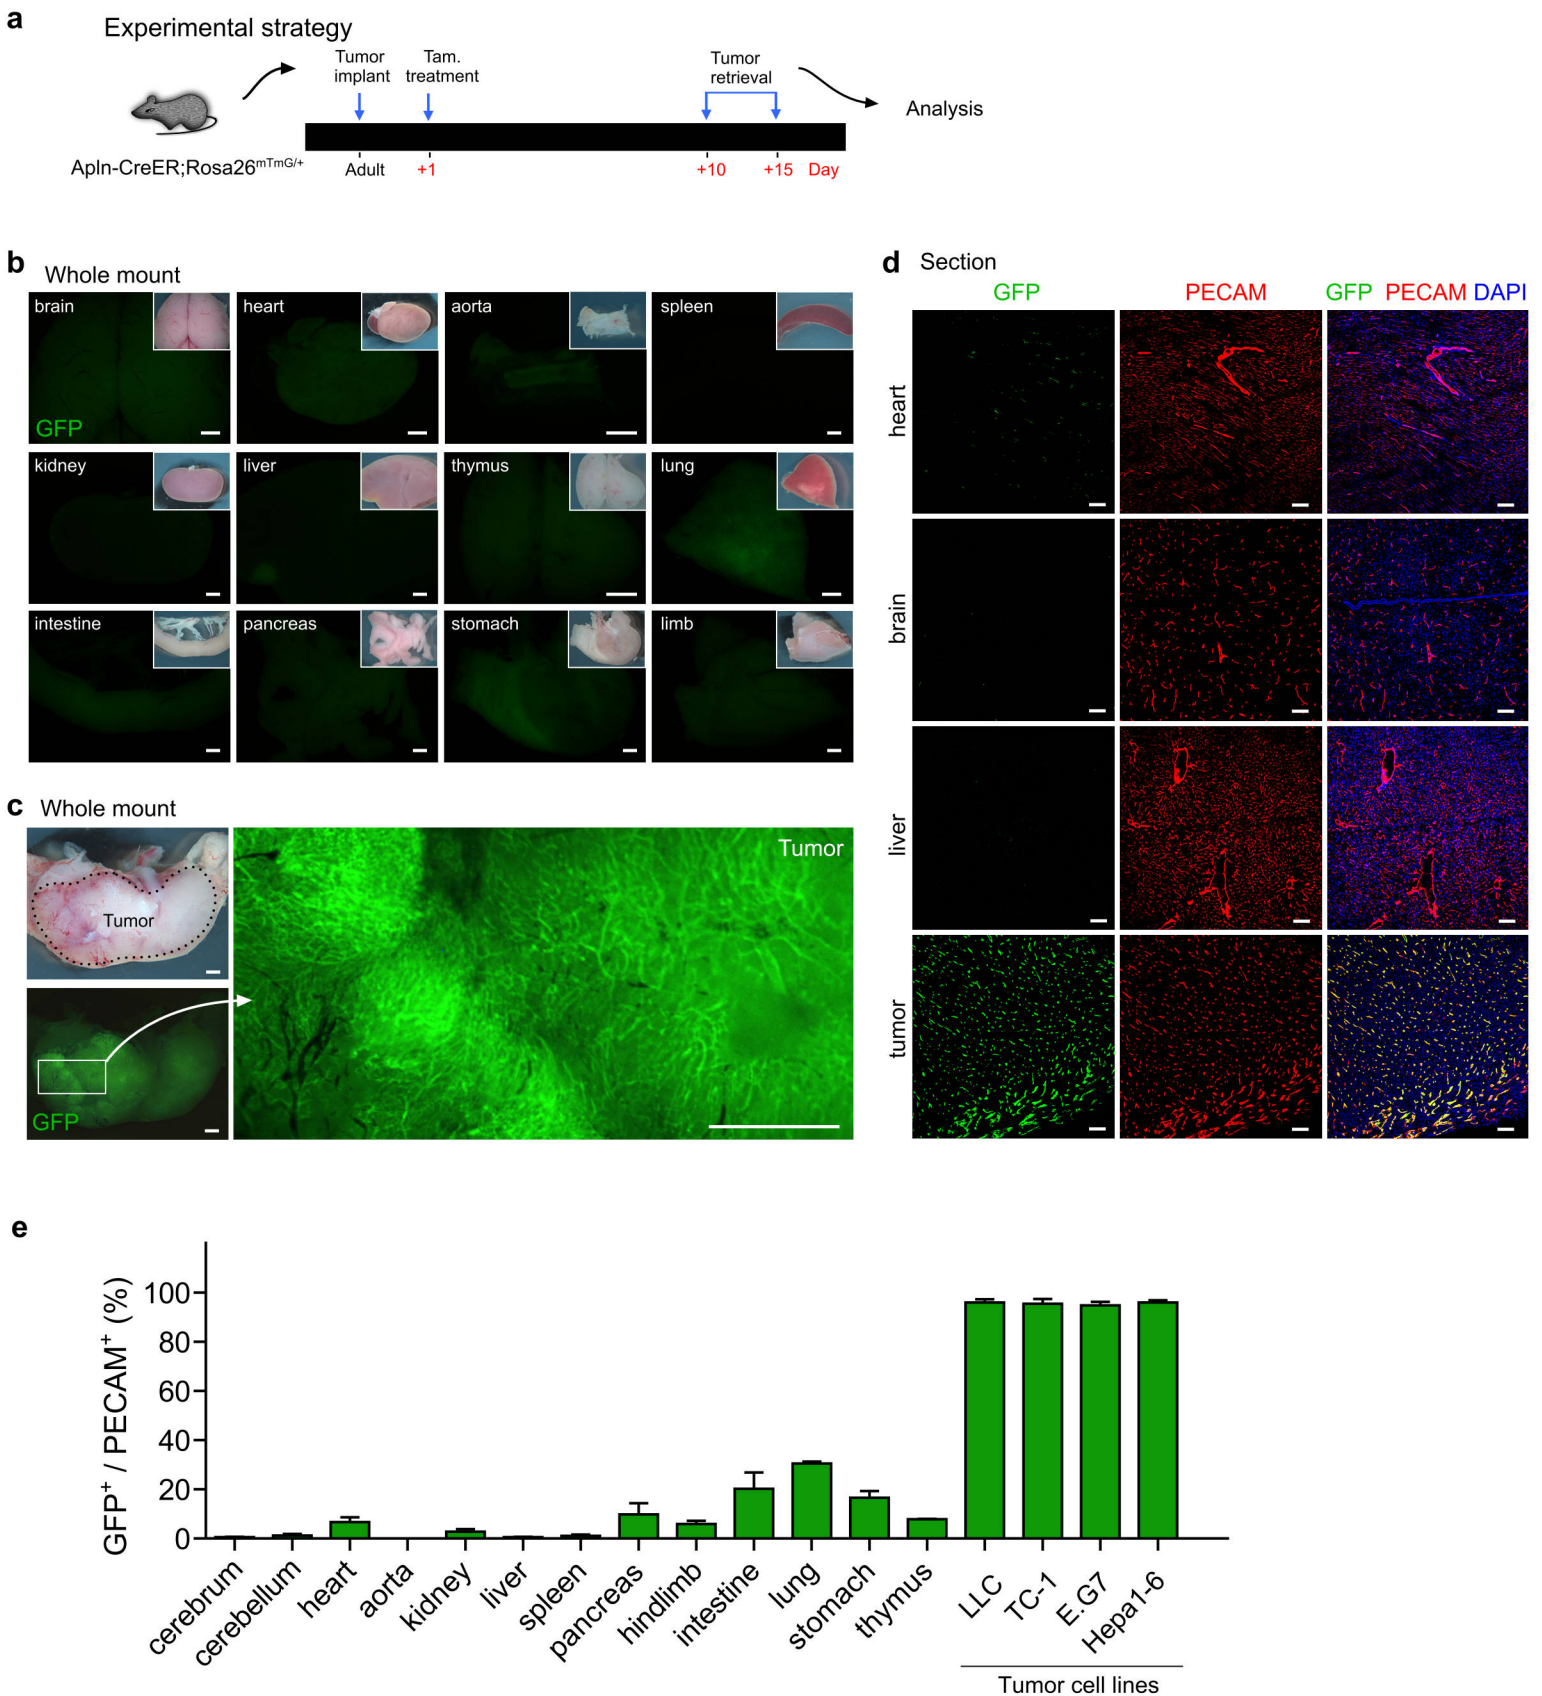

**Supplementary Figure 15. Aplin-CreER labels tumor angiogenic vessels.** (a) Schematic model of the time course of tumor implantation, tamoxifen-induced genetic labeling, and tumor collection. (b,c) Whole mount view of various organs and a tumor from an Aplin-CreER;Rosa26<sup>mTmG/+</sup> mouse. (d) Immunostaining for GFP, PECAM and DAPI of heart, brain, liver and tumor tissue. Images are representative of 3 - 4 individual samples. (e) Quantification of the percentage of GFP<sup>+</sup> vascular endothelial cells in various organs and tumors. Values are shown as means  $\pm$  s.e.m.; n = 3 - 4 for each sample. Scale bars, 1 mm in b,c; 100  $\mu$ m in d.



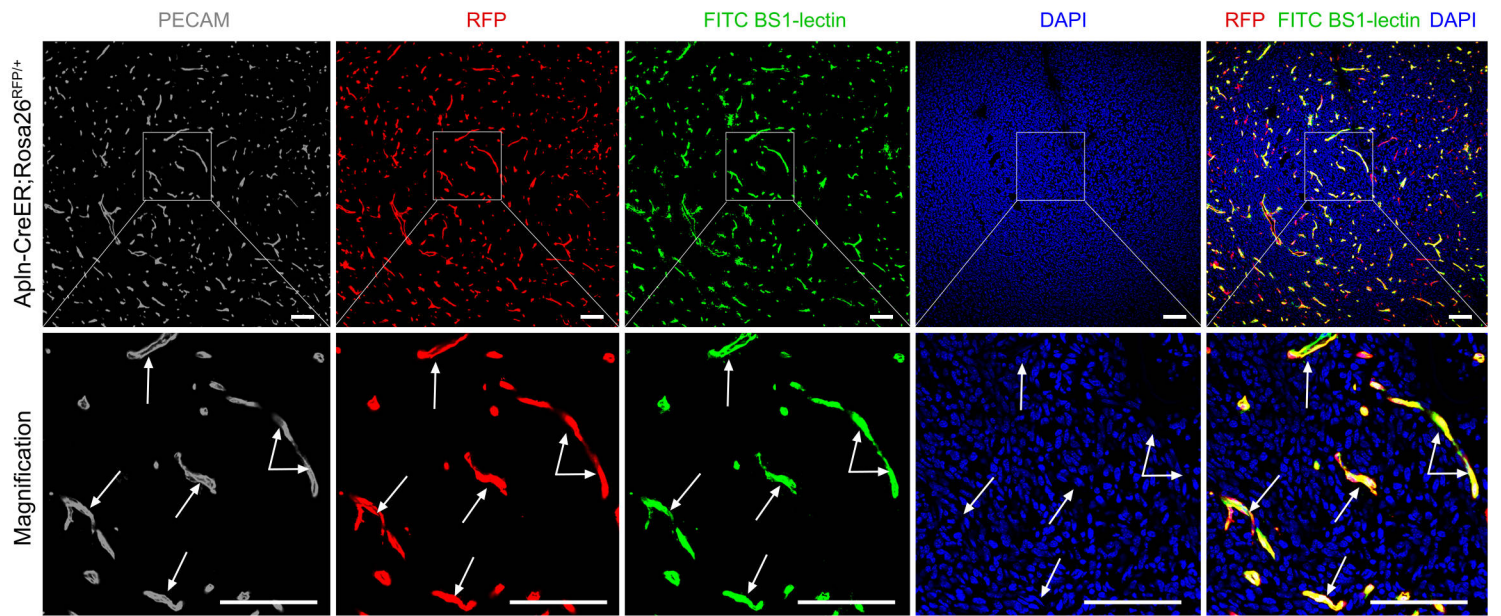

**Supplementary Figure 16. ApIn-CreER labeled tumor vessels are functional.** Immunostaining of PECAM, RFP, FITC BS1-lectin and DAPI on tumor samples from ApIn-CreER;Rosa26<sup>RFP/+</sup> mice. BS1-lectin<sup>+</sup>RFP<sup>+</sup> tumor vessels (white arrows) indicate there is blood flow in these vessels. FITC labeled BS1-lectin was injected into mice inferior caval vein 1 hour before tumor retrieval. Representative of 3 individual samples. Scale bars, 100  $\mu$ m.

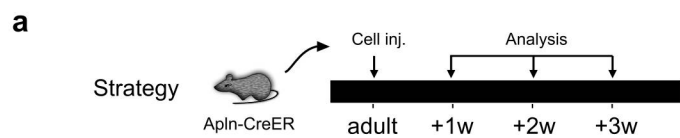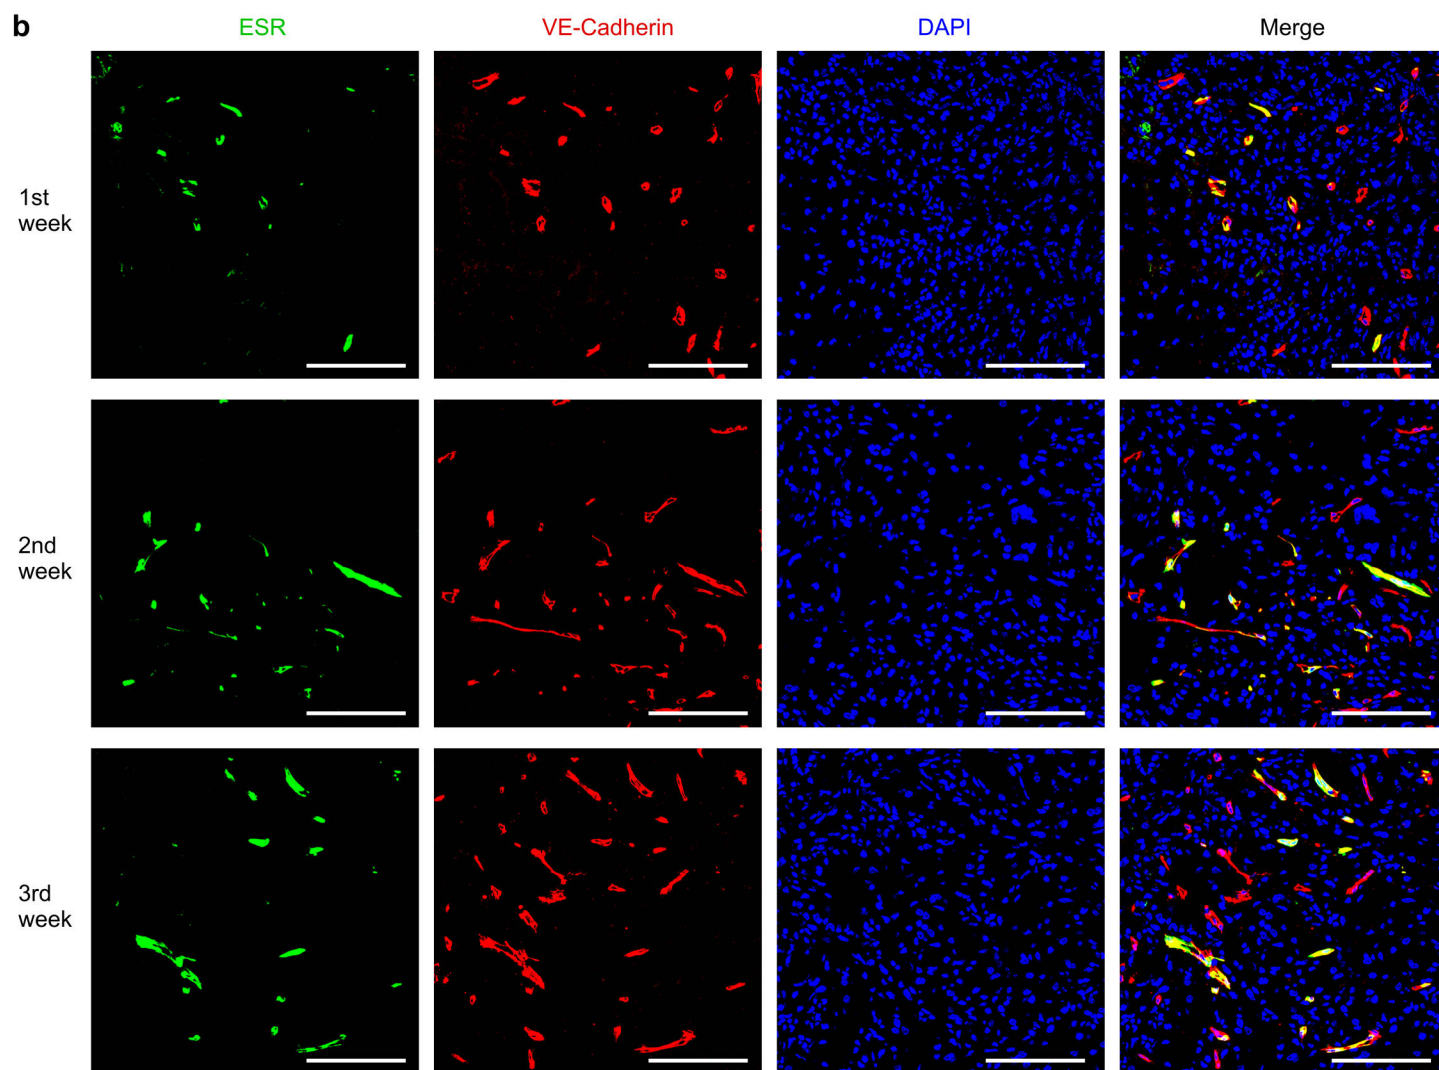

**Supplementary Figure 17. Expression of APLN in tumor endothelial cells.** (a) Strategy of orthotopic liver tumor model establishment in Apln-CreER mice. Liver samples were collected for analysis at 1, 2, 3 weeks after tumor implantation. (b) Immunostaining of estrogen receptor (ESR) as surrogate for APLN expression, endothelial cell marker VE-Cadherin and nuclei dye DAPI on liver tumor sections collected at different time after implantation. Representative of 3 samples for each time point. Scale bars, 100  $\mu$ m.

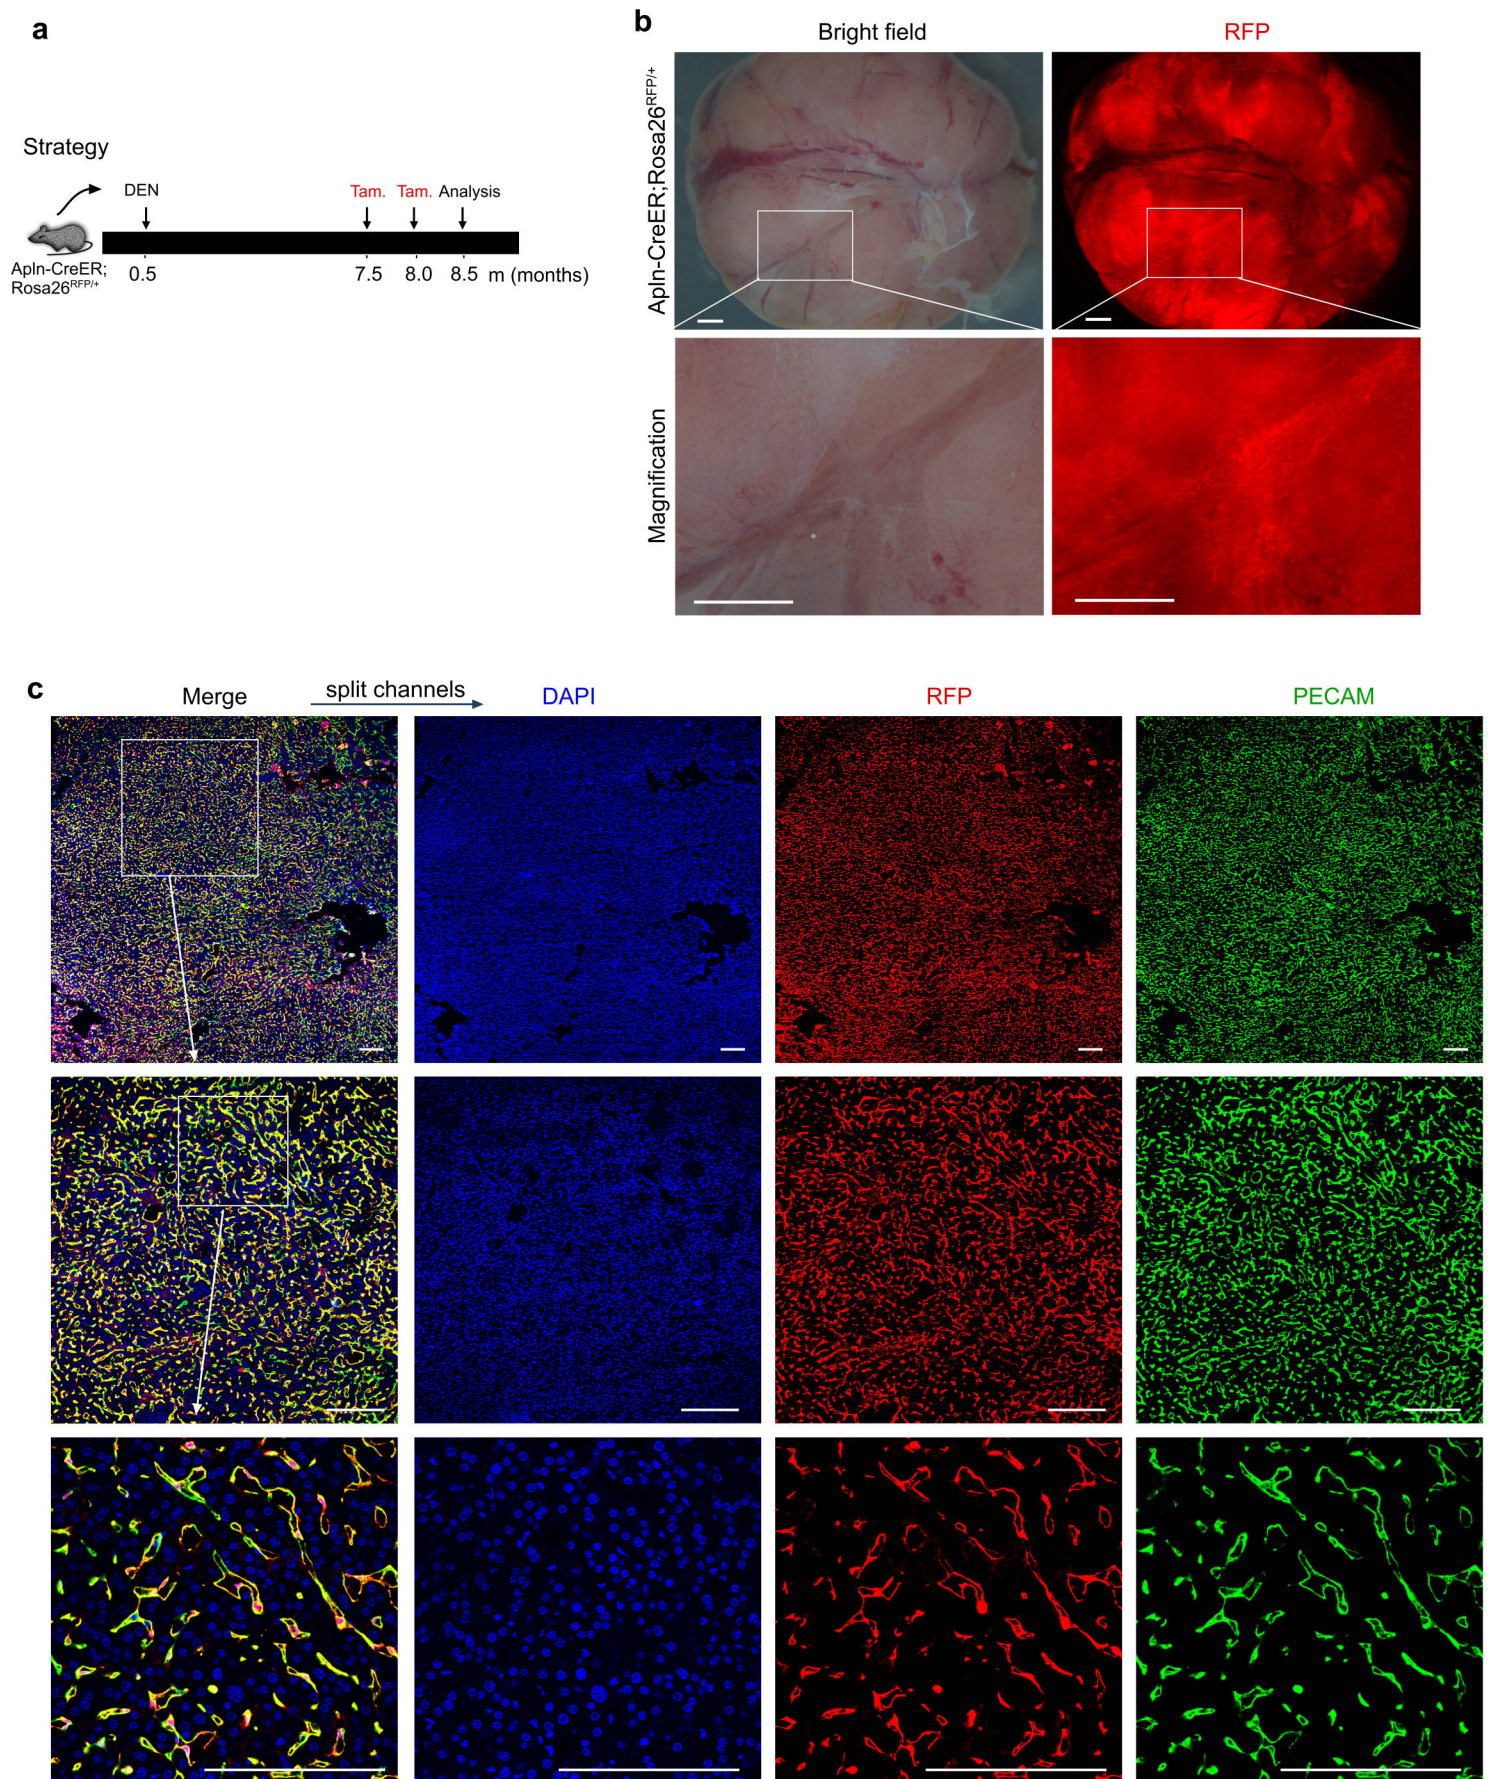

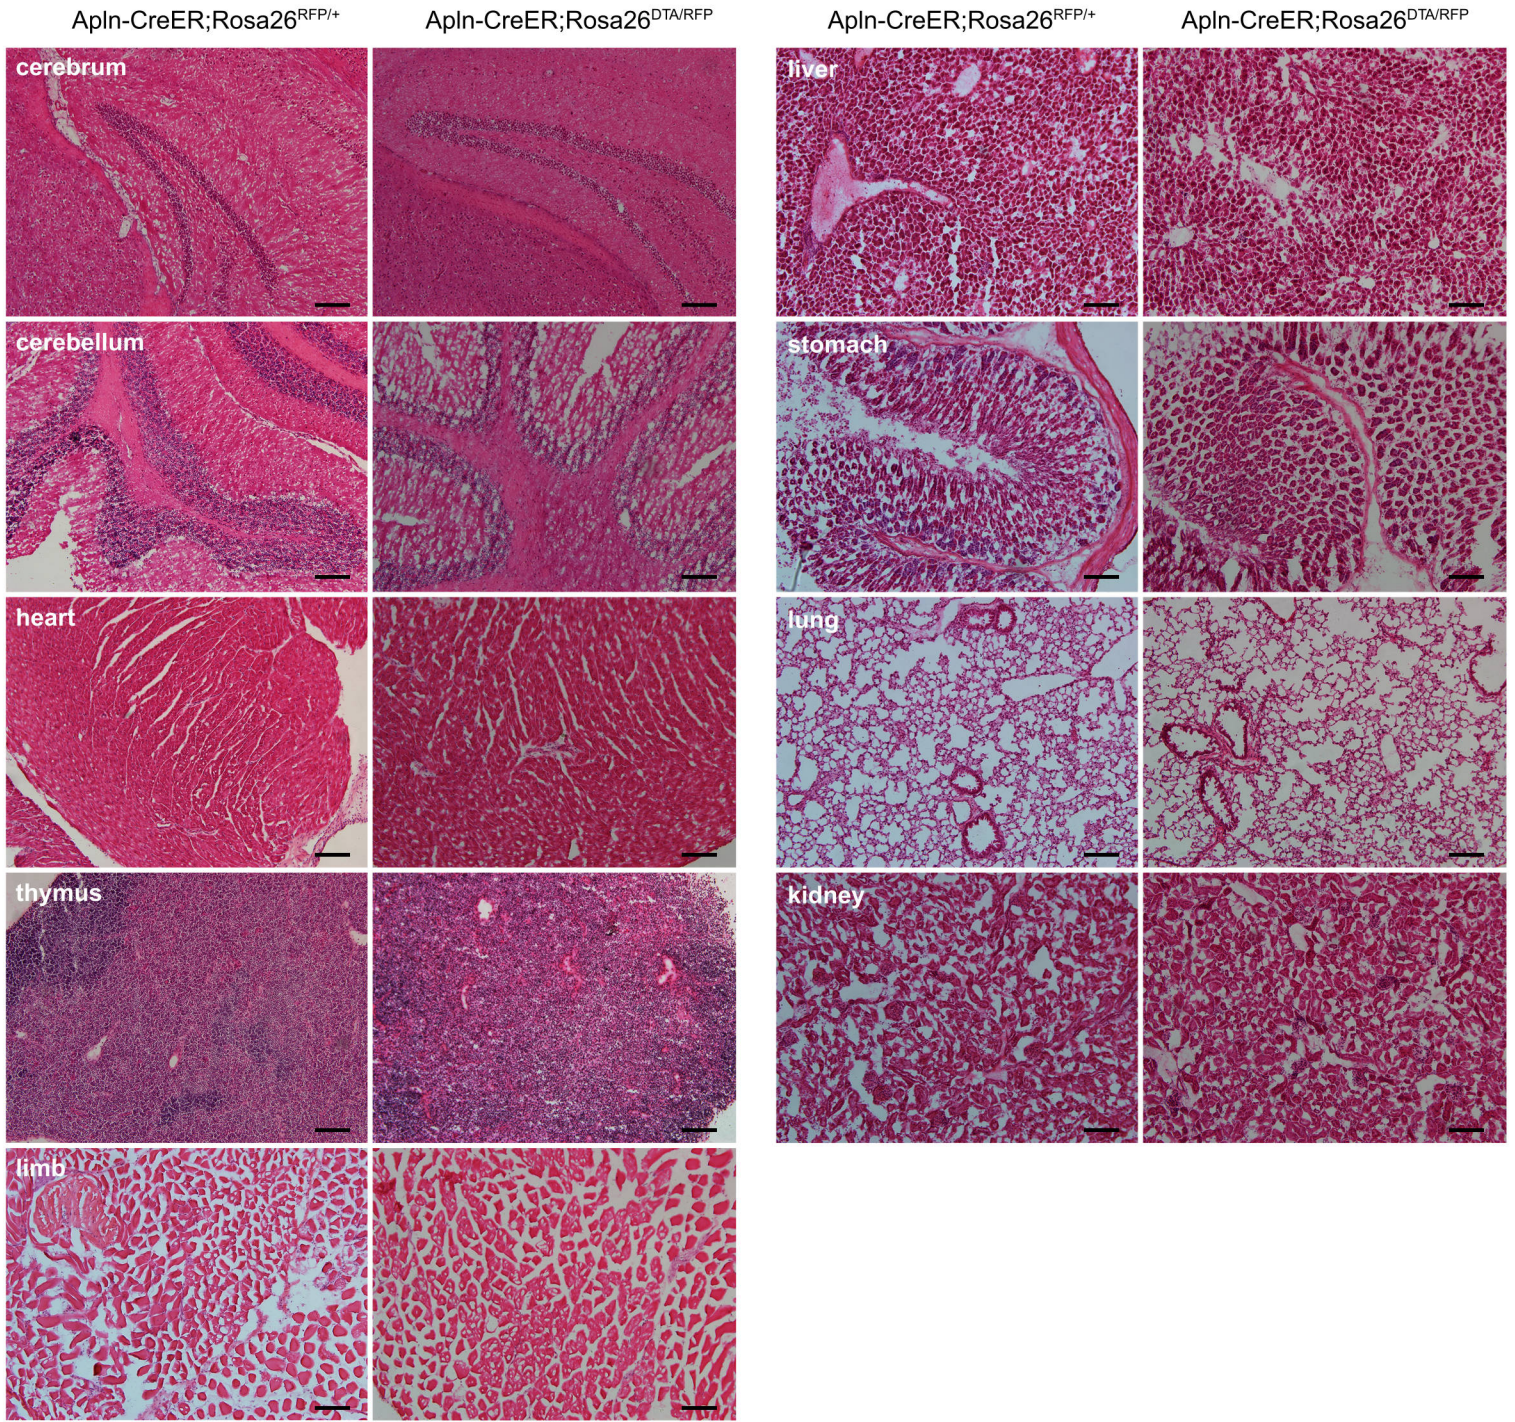

**Supplementary Figure 19. Normal gross morphology in organs following Apln-CreER/DTA-mediated tumor vasculature ablation.** H&E staining of tissue from Apln-CreER;Rosa26<sup>RFP/+</sup> and Apln-CreER;Rosa26<sup>DTA/RFP</sup> mice, both treated with tamoxifen. Images are representative of 3 individual samples per group. Scale bars, 200  $\mu$ m.

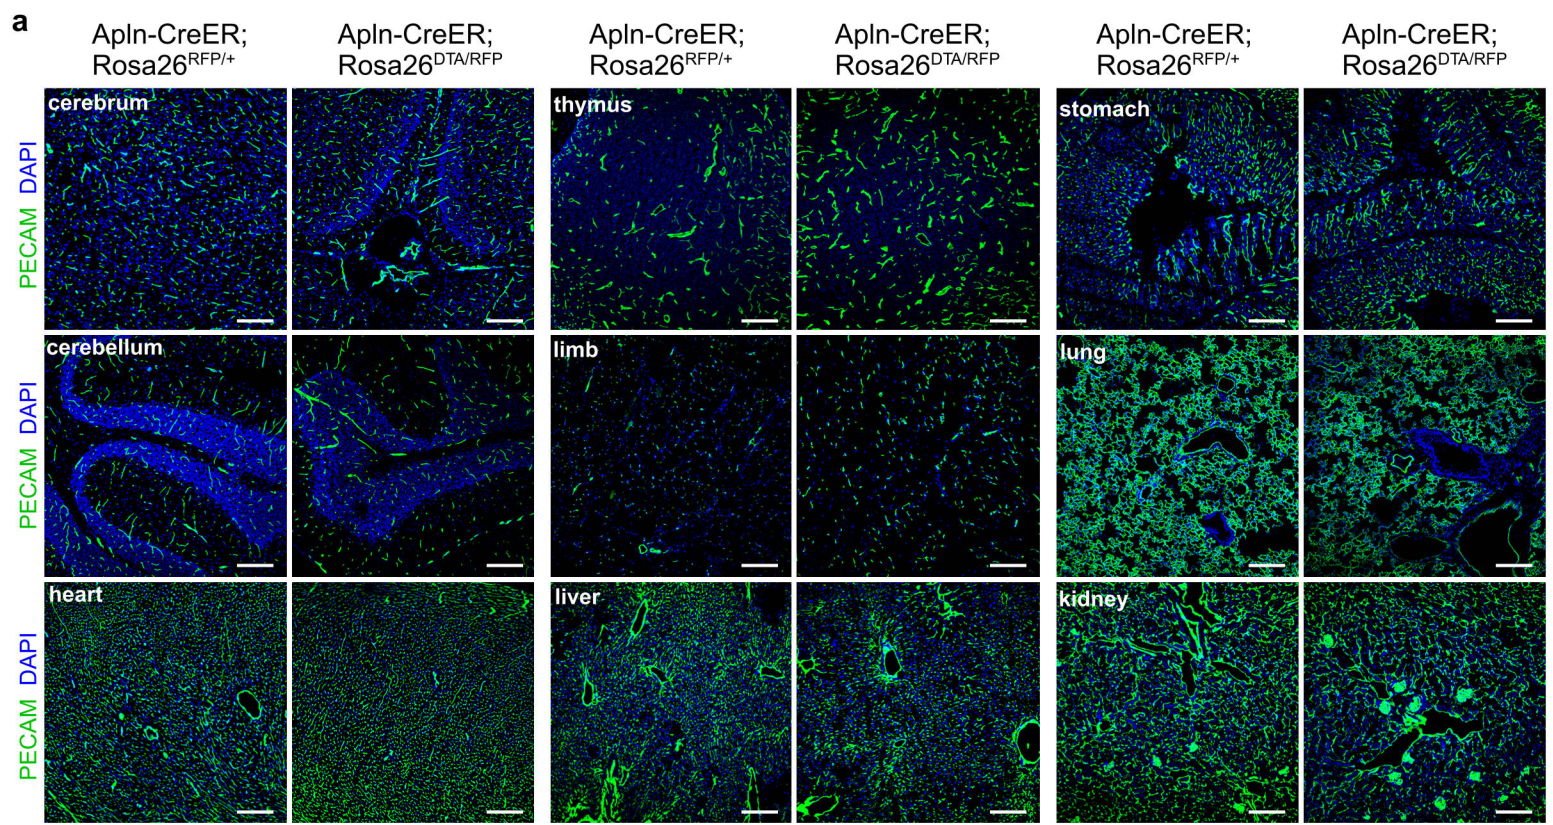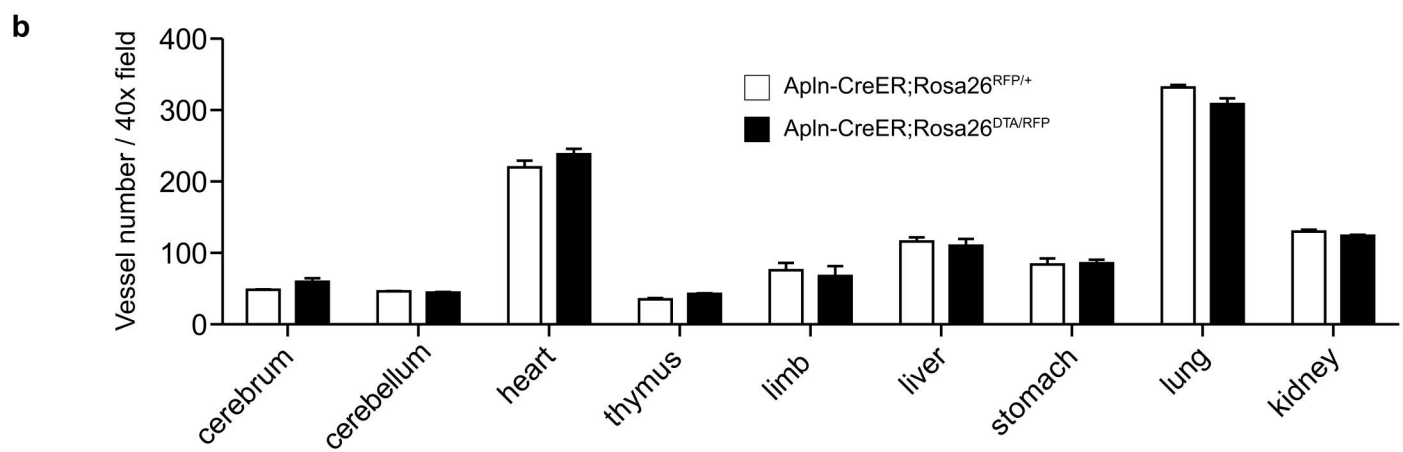

**Supplementary Figure 20. Unaltered vascular density in non-tumorigenic tissues following Apln-CreER/DTA-mediated EC ablation. (a)** PECAM and DAPI staining on non-cancerous tissue sections is indistinguishable in Apln-CreER;Rosa26<sup>RFP/+</sup> and Apln-CreER;Rosa26<sup>DTA/RFP</sup> mice following tamoxifen administration. **(b)** Quantification of vessel number per 40X field of view for various tissues (3 independent samples for each tissue examined). Values are shown as means  $\pm$  s.e.m.; Scale bars, 200  $\mu$ m.

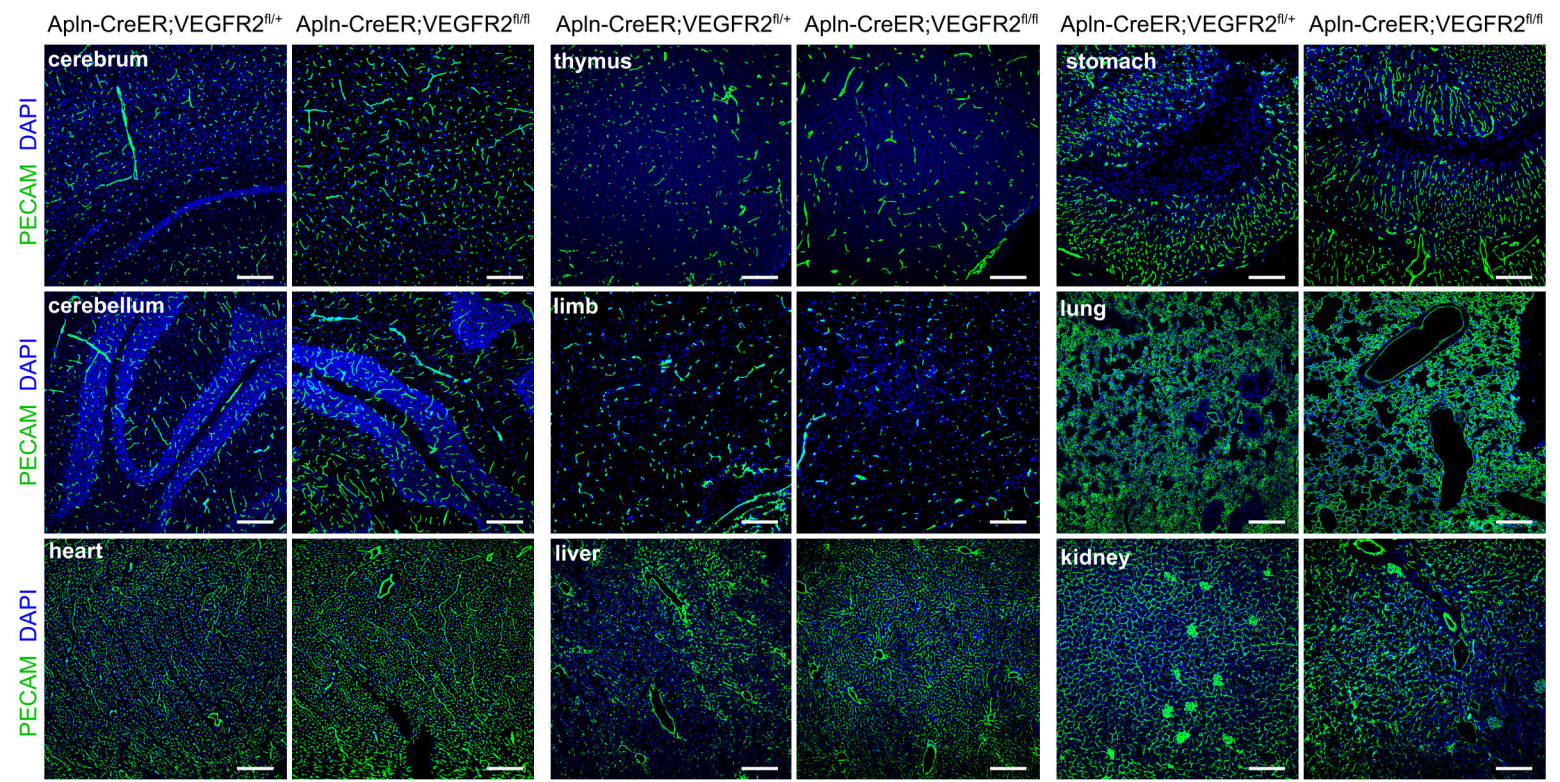

**Supplementary Figure 21. Unaltered vascular density in non-tumorigenic tissues following ApIn-CreER-mediated VEGFR2 deletion.** PECAM and DAPI staining on non-cancerous tissue sections is indistinguishable in ApIn-CreER;VEGFR2<sup>fl/+</sup> and ApIn-CreER;VEGFR2<sup>fl/fl</sup> mice following tamoxifen administration. n = 3. Scale bars, 200  $\mu$ m.

Supplementary Table 1. Human tumor sample information

| Human hepatocellular carcinoma information |     |        |                    |           |                 |
|--------------------------------------------|-----|--------|--------------------|-----------|-----------------|
| No.                                        | age | sex    | differential stage | TNM stage | size (cmxcm)    |
| 1                                          | 35  | male   | I                  | III       | 1.2×1           |
| 2                                          | 51  | male   | II                 | III       | 9.5×8           |
| 3                                          | 37  | female | I                  | III       | 3.5×2           |
| 4                                          | 56  | female | I                  | III       | 2.2×1.2         |
| 5                                          | 73  | male   | IIIB               | III       | 14×10.8×9       |
| 6                                          | 59  | male   | I                  | III       | 2.6×2.2         |
| 7                                          | 70  | male   | II                 | III       | 12.8×7.2        |
| 8                                          | 57  | female | II                 | III       | 6×5×3.8         |
| 9                                          | 56  | female | I                  | II        | 1.6×1.4         |
| 10                                         | 49  | male   | IIIB               | III       | 3×3             |
| 11                                         | 46  | male   | I                  | II        | 2×2             |
| 12                                         | 38  | male   | I                  | III       | 3.5×2.5         |
| 13                                         | 42  | male   | II                 | II-III    | 1.8×1.6、1.8×1.6 |
| 14                                         | 56  | male   | I                  | III       | 2×1.5           |
| 15                                         | 59  | female | I                  | III       | 2.5×2           |

| Human colon tumor samples |     |        |        |           |    |    |       |
|---------------------------|-----|--------|--------|-----------|----|----|-------|
| No.                       | age | sex    | region | TNM phase |    |    | Stage |
| 1                         | 73  | female | R      | T3        | N0 | M0 | II    |
| 2                         | 73  | male   | CL     | T2        | N0 | M1 | IV    |
| 3                         | 59  | male   | R      | T4        | N2 | M0 | III   |
| 4                         | 75  | male   | R      | T4        | N0 | M0 | II    |
| 5                         | 75  | male   | CR     | T4        | N1 | M0 | III   |
| 6                         | 65  | male   | R      | T4        | N2 | M0 | III   |
| 7                         | 65  | male   | CL     | T4        | N1 | M1 | IV    |
| 8                         | 65  | male   | R      | T4        | N2 | M0 | III   |
| 9                         | 37  | female | CL     | T4        | N2 | M0 | III   |
| 10                        | 72  | male   | R      | T4        | N0 | M0 | II    |
| 11                        | 80  | male   | R      | T3        | N0 | M0 | II    |
| 12                        | 75  | male   | R      | T4        | N0 | M0 | II    |

R        rectum  
 CL      colon(left)  
 CR      colon(right)
